# Supplementary material for: Association Between Sleep Traits and Rheumatoid Arthritis: A Mendelian Randomization Study
Source: PubMed Central journal article supplement (PMC9280285; doi:10.3389/fpubh.2022.940161), 2022-06-30

## Supplementary material

Table S1. Characteristics of sleep traits in UK Biobank and rheumatoid arthritis consortium.

| Phenotype            | Type of trait | Author, published year  | Consortium      | Sample size | No. of cases (Binary trait) | PMID     |
|----------------------|---------------|-------------------------|-----------------|-------------|-----------------------------|----------|
| Short sleep duration | Binary        | Park, S. et al, 2020    | UKB             | 321260      | 25,605                      | 33004418 |
| Frequent Insomnia    | Binary        | Lane, J. M. et al, 2019 | UKB             | 237627      | 129,270                     | 30804566 |
| Any Insomnia         | Binary        | Lane, J. M. et al, 2019 | UKB             | 453379      | 345,022                     | 30804566 |
| Sleep duration       | continuous    | Jansen, P. R.2019       | UKB and 23andMe | 1331010     | NA                          | 30804565 |
| Getting up           | continuous    | Jansen, P. R.2019       | UKB and 23andMe | 1331010     | NA                          | 30804565 |
| Morningness          | continuous    | Jansen, P. R.2019       | UKB and 23andMe | 1331010     | NA                          | 30804565 |
| snoring              | Binary        | Jansen, P. R.2019       | UKB and 23andMe | 1331010     | 359,916                     | 30804565 |
| Rheumatoid arthritis | Binary        | Okada Y. 2014           | NA              | 58,284      | 14,361                      | 24390342 |

Table S2. The summary information for instrumental variables of short sleep duration.

| phenotype            | SNP             | effect_allele | other_allele | eaf   | P value  | beta        | se          | Sample size |
|----------------------|-----------------|---------------|--------------|-------|----------|-------------|-------------|-------------|
| Short sleep duration | rs2863957       | C             | A            | 0.782 | 2.60E-18 | 0.054488185 | 0.006243162 | 321260      |
| Short sleep duration | rs13107325      | T             | C            | 0.075 | 2.50E-13 | 0.075107472 | 0.010262117 | 321260      |
| Short sleep duration | rs1229762       | T             | C            | 0.665 | 1.10E-12 | 0.037295785 | 0.005240102 | 321260      |
| Short sleep duration | rs1380703       | G             | A            | 0.384 | 1.60E-11 | 0.035367144 | 0.005248498 | 321260      |
| Short sleep duration | rs12963463      | C             | T            | 0.299 | 1.90E-11 | 0.028587457 | 0.004258199 | 321260      |
| Short sleep duration | rs75539574      | A             | C            | 0.915 | 8.40E-11 | 0.044973366 | 0.006926164 | 321260      |
| Short sleep duration | rs17388803      | C             | A            | 0.106 | 6.50E-10 | 0.05259245  | 0.008513132 | 321260      |
| Short sleep duration | rs4585442       | G             | A            | 0.311 | 8.10E-10 | 0.030529205 | 0.004969791 | 321260      |
| Short sleep duration | rs1607227       | G             | T            | 0.705 | 1.50E-09 | 0.030529205 | 0.005050854 | 321260      |
| Short sleep duration | rs2820313       | G             | A            | 0.341 | 2.30E-09 | 0.030529205 | 0.005109436 | 321260      |
| Short sleep duration | rs17005118      | A             | G            | 0.265 | 2.50E-09 | 0.030529205 | 0.005121099 | 321260      |
| Short sleep duration | rs5757675       | G             | T            | 0.26  | 2.70E-09 | 0.034401427 | 0.005782851 | 321260      |
| Short sleep duration | rs12567114      | G             | A            | 0.725 | 4.10E-09 | 0.036331929 | 0.006178787 | 321260      |
| Short sleep          | rs14218073<br>7 | C             | T            | 0.009 | 4.40E-09 | 0.154436353 | 0.026316568 | 321260      |

|                            |            |   |   |       |          |             |             |        |
|----------------------------|------------|---|---|-------|----------|-------------|-------------|--------|
| duration                   |            |   |   |       |          |             |             |        |
| Short<br>sleep<br>duration | rs2186122  | T | A | 0.562 | 4.80E-09 | 0.023716527 | 0.004051364 | 321260 |
| Short<br>sleep<br>duration | rs11763750 | G | A | 0.814 | 5.10E-09 | 0.035367144 | 0.006052001 | 321260 |
| Short<br>sleep<br>duration | rs12518468 | C | T | 0.328 | 8.50E-09 | 0.031498667 | 0.005470199 | 321260 |
| Short<br>sleep<br>duration | rs9367621  | T | A | 0.431 | 1.60E-08 | 0.023716527 | 0.004197258 | 321260 |
| Short<br>sleep<br>duration | rs3776864  | A | C | 0.667 | 1.70E-08 | 0.031498667 | 0.00558482  | 321260 |
| Short<br>sleep<br>duration | rs60882754 | A | T | 0.939 | 1.80E-08 | 0.055434707 | 0.009845956 | 321260 |
| Short<br>sleep<br>duration | rs59779556 | T | G | 0.554 | 2.00E-08 | 0.024692613 | 0.004399966 | 321260 |
| Short<br>sleep<br>duration | rs2014830  | C | T | 0.698 | 2.70E-08 | 0.029558802 | 0.005316471 | 321260 |
| Short<br>sleep<br>duration | rs205024   | C | T | 0.617 | 2.70E-08 | 0.030529205 | 0.005491008 | 321260 |
| Short<br>sleep<br>duration | rs12661667 | T | C | 0.263 | 2.80E-08 | 0.027615167 | 0.004972567 | 321260 |
| Short<br>sleep<br>duration | rs7939345  | T | G | 0.208 | 4.00E-08 | 0.035367144 | 0.006441103 | 321260 |
| Short<br>sleep<br>duration | rs9321171  | C | T | 0.54  | 4.20E-08 | 0.031498667 | 0.005745595 | 321260 |
| Short<br>sleep<br>duration | rs7524118  | C | T | 0.708 | 4.90E-08 | 0.029558802 | 0.00541876  | 321260 |

Table S3. The summary information for instrumental variables of frequent insomnia.

| phenotype         | SNP         | effect_allele | other_allele | eaf      | pval     | beta     | se       | Sample size |
|-------------------|-------------|---------------|--------------|----------|----------|----------|----------|-------------|
| frequent insomnia | rs11184946  | T             | C            | 0.417223 | 2.90E-10 | 0.012837 | 0.003147 | 237627      |
| frequent insomnia | rs6664467   | G             | A            | 0.863468 | 4.50E-08 | 0.021189 | 0.003117 | 237627      |
| frequent insomnia | rs4751      | T             | G            | 0.425368 | 1.60E-08 | 0.012837 | 0.003147 | 237627      |
| frequent insomnia | rs2644128   | G             | C            | 0.549876 | 1.00E-12 | 0.017033 | 0.003117 | 237627      |
| frequent insomnia | rs12405761  | A             | C            | 0.570608 | 2.60E-11 | 0.017033 | 0.002088 | 237627      |
| frequent insomnia | rs11804386  | A             | G            | 0.332415 | 2.60E-08 | 0.017033 | 0.003117 | 237627      |
| frequent insomnia | rs62158170  | A             | G            | 0.783643 | 5.70E-13 | 0.021189 | 0.004098 | 237627      |
| frequent insomnia | rs4577309   | A             | G            | 0.468107 | 3.70E-09 | 0.012837 | 0.003147 | 237627      |
| frequent insomnia | rs35881094  | G             | T            | 0.426213 | 3.00E-15 | 0.021189 | 0.003117 | 237627      |
| frequent insomnia | rs113851554 | T             | G            | 0.057694 | 1.30E-41 | 0.079181 | 0.007241 | 237627      |
| frequent insomnia | rs72826719  | A             | G            | 0.049281 | 2.20E-12 | 0.041393 | 0.00688  | 237627      |
| frequent insomnia | rs9845387   | C             | A            | 0.959308 | 2.10E-08 | 0.041393 | 0.0079   | 237627      |
| frequent insomnia | rs4683301   | T             | A            | 0.599949 | 4.60E-08 | 0.017033 | 0.003147 | 237627      |
| frequent insomnia | rs10865954  | T             | C            | 0.333944 | 1.70E-09 | 0.017033 | 0.003147 | 237627      |
| frequent insomnia | rs4688760   | T             | C            | 0.690062 | 1.00E-12 | 0.021189 | 0.003117 | 237627      |
| frequent insomnia | rs11097861  | G             | A            | 0.715424 | 1.70E-09 | 0.017033 | 0.002088 | 237627      |
| frequent insomnia | rs1841625   | G             | A            | 0.431882 | 3.60E-08 | 0.012837 | 0.003178 | 237627      |
| frequent insomnia | rs28061     | A             | G            | 0.692042 | 2.10E-08 | 0.017033 | 0.003147 | 237627      |
| frequent insomnia | rs1592757   | C             | G            | 0.356945 | 4.60E-10 | 0.017033 | 0.003117 | 237627      |
| frequent insomnia | rs7711696   | T             | G            | 0.304975 | 9.90E-12 | 0.021189 | 0.003117 | 237627      |

|                   |            |   |   |          |          |          |          |        |
|-------------------|------------|---|---|----------|----------|----------|----------|--------|
| frequent insomnia | rs1430205  | T | C | 0.458038 | 3.60E-08 | 0.012837 | 0.003147 | 237627 |
| frequent insomnia | rs6932158  | C | T | 0.490999 | 2.80E-08 | 0.012837 | 0.003147 | 237627 |
| frequent insomnia | rs314280   | G | A | 0.54824  | 3.50E-10 | 0.01703  | 0.00315  | 237627 |
| frequent insomnia | rs10947690 | G | A | 0.261294 | 3.50E-08 | 0.017033 | 0.004176 | 237627 |
| frequent insomnia | rs3824081  | T | C | 0.474743 | 1.10E-08 | 0.017033 | 0.003117 | 237627 |
| frequent insomnia | rs10280045 | G | C | 0.573651 | 1.00E-10 | 0.017033 | 0.002088 | 237627 |
| frequent insomnia | rs302165   | G | A | 0.216374 | 2.40E-06 | 0.017033 | 0.004176 | 237627 |
| frequent insomnia | rs6593005  | G | A | 0.740998 | 8.60E-09 | 0.012837 | 0.003147 | 237627 |
| frequent insomnia | rs17151854 | T | G | 0.153806 | 2.40E-08 | 0.025306 | 0.004098 | 237627 |
| frequent insomnia | rs10156602 | A | G | 0.638126 | 3.40E-12 | 0.017033 | 0.002088 | 237627 |
| frequent insomnia | rs2296580  | G | T | 0.702115 | 8.70E-12 | 0.021189 | 0.004098 | 237627 |
| frequent insomnia | rs11191595 | A | C | 0.936734 | 1.50E-09 | 0.041393 | 0.0079   | 237627 |
| frequent insomnia | rs10838708 | G | A | 0.541245 | 2.50E-09 | 0.012837 | 0.002108 | 237627 |
| frequent insomnia | rs68094047 | T | C | 0.250411 | 3.30E-09 | 0.017033 | 0.003117 | 237627 |
| frequent insomnia | rs324017   | A | C | 0.294759 | 1.10E-10 | 0.021189 | 0.003088 | 237627 |
| frequent insomnia | rs2956278  | G | A | 0.214809 | 1.30E-08 | 0.021189 | 0.004137 | 237627 |
| frequent insomnia | rs1923770  | T | A | 0.383028 | 2.30E-12 | 0.021189 | 0.003117 | 237627 |
| frequent insomnia | rs1031654  | C | A | 0.201527 | 2.00E-09 | 0.021189 | 0.004137 | 237627 |
| frequent insomnia | rs4886140  | G | A | 0.668277 | 3.10E-10 | 0.017033 | 0.003117 | 237627 |
| frequent insomnia | rs11635495 | C | T | 0.514746 | 6.80E-09 | 0.017033 | 0.003147 | 237627 |
| frequent insomnia | rs4886860  | G | C | 0.23362  | 6.10E-12 | 0.02119  | 0.00312  | 237627 |
| frequent insomnia | rs1544637  | T | C | 0.487502 | 3.00E-08 | 0.012837 | 0.002108 | 237627 |

|                   |            |   |   |          |          |          |          |        |
|-------------------|------------|---|---|----------|----------|----------|----------|--------|
| frequent insomnia | rs3104778  | A | G | 0.589387 | 4.20E-08 | 0.012837 | 0.003178 | 237627 |
| frequent insomnia | rs2062113  | T | C | 0.429502 | 1.90E-10 | 0.017033 | 0.003147 | 237627 |
| frequent insomnia | rs17139246 | C | T | 0.389356 | 4.10E-08 | 0.012837 | 0.003147 | 237627 |
| frequent insomnia | rs17669584 | G | A | 0.19491  | 3.60E-08 | 0.01703  | 0.00312  | 237627 |
| frequent insomnia | rs11651809 | G | C | 0.296    | 2.10E-15 | 0.021    | 0.003    | 237627 |
| frequent insomnia | rs1942262  | A | G | 0.292258 | 1.10E-13 | 0.017033 | 0.003117 | 237627 |
| frequent insomnia | rs11673344 | G | A | 0.380184 | 9.00E-10 | 0.017033 | 0.003117 | 237627 |

Table S4. The summary information for instrumental variables of any insomnia.

| phenotype    | SNP         | effect_<br>allele | other_<br>allele | eaf      | pval     | Sample<br>size | beta        | se          |
|--------------|-------------|-------------------|------------------|----------|----------|----------------|-------------|-------------|
| Any insomnia | rs11184946  | T                 | C                | 0.417223 | 2.00E-07 | 453379         | 0.019802627 | 0.003808683 |
| Any insomnia | rs6664467   | G                 | A                | 0.863468 | 7.60E-06 | 453379         | 0.029558802 | 0.006603617 |
| Any insomnia | rs4751      | T                 | G                | 0.425368 | 6.30E-05 | 453379         | 0.019802627 | 0.00494907  |
| Any insomnia | rs2644128   | G                 | C                | 0.549876 | 2.90E-11 | 453379         | 0.029558802 | 0.004443889 |
| Any insomnia | rs12405761  | A                 | C                | 0.570608 | 4.40E-08 | 453379         | 0.029558802 | 0.005399859 |
| Any insomnia | rs2613503   | A                 | C                | 0.801866 | 4.90E-08 | 453379         | 0.029558802 | 0.00541876  |
| Any insomnia | rs11804386  | A                 | G                | 0.332415 | 7.00E-09 | 453379         | 0.029558802 | 0.005104332 |
| Any insomnia | rs62158170  | A                 | G                | 0.783643 | 1.30E-16 | 453379         | 0.048790164 | 0.005897107 |
| Any insomnia | rs4577309   | A                 | G                | 0.468107 | 2.10E-08 | 453379         | 0.029558802 | 0.005275009 |
| Any insomnia | rs12713372  | C                 | T                | 0.565758 | 8.50E-09 | 453379         | 0.029558802 | 0.005133313 |
| Any insomnia | rs35881094  | G                 | T                | 0.426213 | 8.50E-13 | 453379         | 0.039220713 | 0.005483236 |
| Any insomnia | rs2192338   | C                 | G                | 0.779652 | 5.90E-09 | 453379         | 0.039220713 | 0.006739455 |
| Any insomnia | rs113851554 | T                 | G                | 0.057694 | 2.10E-28 | 453379         | 0.131028262 | 0.011853626 |
| Any insomnia | rs72826719  | A                 | G                | 0.049281 | 3.80E-06 | 453379         | 0.058268908 | 0.012606774 |
| Any insomnia | rs9845387   | C                 | A                | 0.959308 | 1.00E-06 | 453379         | 0.067658648 | 0.01383149  |
| Any insomnia | rs6785034   | A                 | G                | 0.42201  | 3.40E-08 | 453379         | 0.029558802 | 0.005355358 |
| Any insomnia | rs4683301   | T                 | A                | 0.599949 | 1.80E-05 | 453379         | 0.019802627 | 0.004617766 |
| Any insomnia | rs10865954  | T                 | C                | 0.333944 | 4.70E-09 | 453379         | 0.029558802 | 0.005046352 |
| Any insomnia | rs4688760   | T                 | C                | 0.690062 | 7.30E-12 | 453379         | 0.039220713 | 0.005724268 |
| Any insomnia | rs55946513  | C                 | T                | 0.93413  | 1.40E-08 | 453379         | 0.048790164 | 0.008599827 |
| Any insomnia | rs11097861  | G                 | A                | 0.715424 | 4.00E-09 | 453379         | 0.029558802 | 0.005023425 |
| Any insomnia | rs1841625   | G                 | A                | 0.431882 | 1.00E-05 | 453379         | 0.019802627 | 0.004483099 |
| Any insomnia | rs28061     | A                 | G                | 0.692042 | 3.40E-07 | 453379         | 0.029558802 | 0.005796063 |
| Any insomnia | rs1592757   | C                 | G                | 0.356945 | 2.80E-05 | 453379         | 0.019802627 | 0.004727122 |
| Any insomnia | rs7711696   | T                 | G                | 0.304975 | 3.10E-07 | 453379         | 0.029558802 | 0.005776291 |
| Any insomnia | rs1430205   | T                 | C                | 0.458038 | 7.60E-08 | 453379         | 0.029558802 | 0.005497905 |
| Any insomnia | rs6932158   | C                 | T                | 0.490999 | 1.30E-05 | 453379         | 0.029558802 | 0.006779378 |
| Any insomnia | rs314280    | G                 | A                | 0.54824  | 0.00041  | 453379         | 0.019802627 | 0.005604155 |
| Any insomnia | rs10947690  | G                 | A                | 0.261294 | 9.30E-07 | 453379         | 0.029558802 | 0.006025154 |
| Any insomnia | rs3824081   | T                 | C                | 0.474743 | 2.50E-10 | 453379         | 0.039220713 | 0.006198959 |
| Any insomnia | rs10280045  | G                 | C                | 0.573651 | 3.80E-06 | 453379         | 0.029558802 | 0.006395197 |
| Any insomnia | rs302165    | G                 | A                | 0.216374 | 3.30E-08 | 453379         | 0.029558802 | 0.005350275 |
| Any insomnia | rs6593005   | G                 | A                | 0.740998 | 1.30E-06 | 453379         | 0.019802627 | 0.00409166  |
| Any insomnia | rs17151854  | T                 | G                | 0.153806 | 8.00E-05 | 453379         | 0.029558802 | 0.007493865 |
| Any insomnia | rs11793831  | G                 | T                | 0.583428 | 2.10E-08 | 453379         | 0.029558802 | 0.005275009 |
| Any insomnia | rs11793074  | A                 | G                | 0.853086 | 8.00E-09 | 453379         | 0.039220713 | 0.006799167 |
| Any insomnia | rs10156602  | A                 | G                | 0.638126 | 1.20E-08 | 453379         | 0.029558802 | 0.005186004 |
| Any insomnia | rs2296580   | G                 | T                | 0.702115 | 2.20E-08 | 453379         | 0.039220713 | 0.007009344 |
| Any insomnia | rs11191595  | A                 | C                | 0.936734 | 2.10E-09 | 453379         | 0.076961041 | 0.012848518 |
| Any insomnia | rs10838708  | G                 | A                | 0.541245 | 1.40E-05 | 453379         | 0.019802627 | 0.004558762 |

|              |            |   |   |          |          |        |             |             |
|--------------|------------|---|---|----------|----------|--------|-------------|-------------|
| Any insomnia | rs68094047 | T | C | 0.250411 | 2.20E-07 | 453379 | 0.029558802 | 0.005704579 |
| Any insomnia | rs324017   | A | C | 0.294759 | 2.20E-08 | 453379 | 0.029558802 | 0.005282612 |
| Any insomnia | rs2956278  | G | A | 0.214809 | 2.50E-07 | 453379 | 0.029558802 | 0.005731003 |
| Any insomnia | rs2147141  | G | C | 0.543173 | 5.30E-09 | 453379 | 0.029558802 | 0.005063634 |
| Any insomnia | rs1923770  | T | A | 0.383028 | 4.70E-09 | 453379 | 0.029558802 | 0.005046352 |
| Any insomnia | rs1031654  | C | A | 0.201527 | 6.50E-07 | 453379 | 0.039220713 | 0.007882393 |
| Any insomnia | rs4886140  | G | A | 0.668277 | 9.90E-07 | 453379 | 0.029558802 | 0.006040278 |
| Any insomnia | rs11635495 | C | T | 0.514746 | 3.60E-06 | 453379 | 0.019802627 | 0.004274041 |
| Any insomnia | rs4886860  | G | C | 0.23362  | 1.30E-10 | 453379 | 0.039220713 | 0.006102329 |
| Any insomnia | rs1544637  | T | C | 0.487502 | 9.80E-06 | 453379 | 0.019802627 | 0.004478672 |
| Any insomnia | rs3104778  | A | G | 0.589387 | 2.50E-07 | 453379 | 0.019802627 | 0.003839429 |
| Any insomnia | rs2062113  | T | C | 0.429502 | 3.40E-07 | 453379 | 0.029558802 | 0.005796063 |
| Any insomnia | rs17139246 | C | T | 0.389356 | 1.30E-05 | 453379 | 0.019802627 | 0.004541778 |
| Any insomnia | rs17669584 | G | A | 0.19491  | 5.00E-08 | 453379 | 0.039220713 | 0.007194731 |
| Any insomnia | rs11651809 | G | C | 0.296    | 5.00E-12 | 453379 | 0.039220713 | 0.005679571 |
| Any insomnia | rs1942262  | A | G | 0.292258 | 3.10E-11 | 453379 | 0.029558802 | 0.00445046  |
| Any insomnia | rs11673344 | G | A | 0.380184 | 7.10E-08 | 453379 | 0.029558802 | 0.00548541  |



Table S5. The summary information for instrumental variables of sleep duration.

| phenotype      | SNP         | effect_allele | other_allele | beta  | se       | eaf    | pval     | samplesize |
|----------------|-------------|---------------|--------------|-------|----------|--------|----------|------------|
| Sleep duration | rs4642942   | C             | G            | 0.01  | 0.002492 | 0.4148 | 3.07E-05 | 1331010    |
| Sleep duration | rs915416    | C             | G            | 0.02  | 0.002694 | 0.2906 | 8.15E-12 | 1331010    |
| Sleep duration | rs540431    | G             | A            | -0.01 | 0.002465 | 0.4502 | 4.91E-06 | 1331010    |
| Sleep duration | rs1392817   | A             | G            | 0.01  | 0.002493 | 0.4773 | 1.84E-05 | 1331010    |
| Sleep duration | rs79512144  | A             | G            | -0.03 | 0.004972 | 0.0648 | 3.64E-05 | 1331010    |
| Sleep duration | rs11682175  | C             | T            | 0.02  | 0.002457 | 0.4734 | 1.09E-10 | 1331010    |
| Sleep duration | rs116219610 | T             | C            | 0.02  | 0.00311  | 0.1927 | 4.75E-11 | 1331010    |
| Sleep duration | rs2863244   | G             | A            | -0.01 | 0.002491 | 0.4382 | 3.18E-05 | 1331010    |
| Sleep duration | rs62158206  | C             | T            | 0.04  | 0.002968 | 0.2189 | 3.00E-40 | 1331010    |
| Sleep duration | rs35662245  | A             | T            | 0.02  | 0.002582 | 0.3389 | 6.23E-06 | 1331010    |
| Sleep duration | rs11883686  | T             | A            | -0.01 | 0.002601 | 0.3322 | 1.01E-05 | 1331010    |
| Sleep duration | rs12463754  | G             | C            | 0.02  | 0.002771 | 0.2706 | 3.91E-07 | 1331010    |
| Sleep duration | rs112230981 | G             | A            | -0.03 | 0.005698 | 0.0485 | 4.59E-05 | 1331010    |
| Sleep duration | rs4688116   | G             | T            | -0.01 | 0.002508 | 0.4033 | 4.20E-05 | 1331010    |
| Sleep duration | rs16834426  | A             | G            | 0.02  | 0.002763 | 0.2685 | 1.76E-05 | 1331010    |
| Sleep duration | rs9843801   | C             | T            | 0.02  | 0.002584 | 0.3414 | 5.82E-10 | 1331010    |
| Sleep duration | rs2192528   | A             | G            | 0.02  | 0.002452 | 0.4772 | 6.27E-07 | 1331010    |
| Sleep duration | rs7686205   | G             | A            | 0.01  | 0.002519 | 0.3794 | 1.37E-05 | 1331010    |
| Sleep duration | rs41501452  | G             | A            | -0.02 | 0.002633 | 0.3155 | 4.04E-06 | 1331010    |
| Sleep duration | rs17285646  | A             | T            | 0.01  | 0.002452 | 0.4764 | 1.88E-05 | 1331010    |
| Sleep duration | rs13109404  | G             | T            | -0.03 | 0.004795 | 0.0704 | 1.13E-08 | 1331010    |
| Sleep duration | rs365663    | G             | A            | -0.02 | 0.002462 | 0.4551 | 1.12E-08 | 1331010    |
| Sleep duration | rs6889592   | A             | G            | 0.02  | 0.002596 | 0.3324 | 1.44E-08 | 1331010    |
| Sleep duration | rs113322698 | A             | G            | 0.01  | 0.002574 | 0.3424 | 1.94E-05 | 1331010    |
| Sleep duration | rs12215241  | A             | G            | -0.02 | 0.002931 | 0.2247 | 6.09E-10 | 1331010    |
| Sleep duration | rs34388845  | G             | A            | -0.02 | 0.002983 | 0.2136 | 5.43E-07 | 1331010    |
| Sleep duration | rs1633063   | T             | C            | -0.02 | 0.002839 | 0.246  | 3.17E-06 | 1331010    |
| Sleep duration | rs9451146   | T             | C            | -0.02 | 0.002915 | 0.228  | 8.53E-06 | 1331010    |
| Sleep duration | rs9362971   | C             | T            | -0.01 | 0.002567 | 0.3461 | 1.41E-05 | 1331010    |
| Sleep duration | rs3823624   | C             | T            | 0.02  | 0.003188 | 0.1807 | 1.30E-06 | 1331010    |
| Sleep duration | rs6979198   | G             | T            | 0.02  | 0.003    | 0.2109 | 1.07E-05 | 1331010    |
| Sleep duration | rs7778250   | C             | A            | -0.01 | 0.002696 | 0.2898 | 4.96E-05 | 1331010    |
| Sleep duration | rs1668331   | T             | G            | -0.02 | 0.00254  | 0.3738 | 5.20E-07 | 1331010    |
| Sleep duration | rs651902    | C             | T            | 0.01  | 0.002534 | 0.3843 | 3.35E-09 | 1331010    |
| Sleep duration | rs12336359  | C             | G            | 0.01  | 0.002523 | 0.4037 | 9.42E-06 | 1331010    |
| Sleep duration | rs10973207  | T             | G            | 0.02  | 0.003391 | 0.1549 | 2.02E-06 | 1331010    |
| Sleep duration | rs144625846 | G             | A            | -0.02 | 0.003575 | 0.1346 | 1.05E-05 | 1331010    |
| Sleep duration | rs7915425   | T             | C            | 0.02  | 0.003221 | 0.1758 | 3.08E-07 | 1331010    |
| Sleep duration | rs7115856   | C             | A            | 0.01  | 0.002452 | 0.4613 | 1.25E-06 | 1331010    |
| Sleep duration | rs12791153  | T             | A            | 0.03  | 0.004614 | 0.0772 | 2.89E-05 | 1331010    |
| Sleep duration | rs1553132   | G             | A            | 0.02  | 0.002788 | 0.2586 | 6.63E-06 | 1331010    |

|                |            |   |   |       |          |        |          |         |
|----------------|------------|---|---|-------|----------|--------|----------|---------|
| Sleep duration | rs1263056  | G | A | -0.01 | 0.002471 | 0.4817 | 4.15E-05 | 1331010 |
| Sleep duration | rs4767550  | G | A | 0.01  | 0.002507 | 0.4128 | 2.70E-06 | 1331010 |
| Sleep duration | rs11621908 | T | C | -0.03 | 0.004548 | 0.0796 | 4.95E-06 | 1331010 |
| Sleep duration | rs13329140 | A | G | -0.02 | 0.002888 | 0.2359 | 7.51E-08 | 1331010 |
| Sleep duration | rs77684884 | G | A | 0.02  | 0.003197 | 0.1878 | 5.83E-07 | 1331010 |
| Sleep duration | rs28651105 | G | A | 0.02  | 0.002969 | 0.2165 | 4.75E-05 | 1331010 |
| Sleep duration | rs8047587  | T | G | -0.02 | 0.002468 | 0.4396 | 1.09E-09 | 1331010 |
| Sleep duration | rs11076146 | G | T | 0.01  | 0.002461 | 0.44   | 2.96E-06 | 1331010 |
| Sleep duration | rs11654671 | T | A | 0.02  | 0.002928 | 0.2348 | 3.71E-05 | 1331010 |
| Sleep duration | rs11650677 | A | G | 0.01  | 0.00258  | 0.3394 | 8.95E-09 | 1331010 |
| Sleep duration | rs62061734 | C | T | -0.02 | 0.002967 | 0.2205 | 2.17E-06 | 1331010 |
| Sleep duration | rs12607679 | C | T | -0.02 | 0.002821 | 0.2595 | 9.79E-08 | 1331010 |

Table S6. The summary information for instrumental variables of getting up.

| phenotype  | SNP         | effect_allele | other_allele | beta  | se     | eaf    | pval     | samplesize |
|------------|-------------|---------------|--------------|-------|--------|--------|----------|------------|
| Getting up | rs61773374  | G             | A            | 0.02  | 0.0022 | 0.195  | 3.37E-14 | 1331010    |
| Getting up | rs148173313 | A             | G            | 0.02  | 0.0022 | 0.0055 | 9.39E-08 | 1331010    |
| Getting up | rs301806    | C             | T            | -0.01 | 0.0017 | 0.4208 | 4.73E-05 | 1331010    |
| Getting up | rs77576965  | T             | C            | 0.01  | 0.0019 | 0.2727 | 1.94E-05 | 1331010    |
| Getting up | rs12752290  | C             | T            | 0.01  | 0.0017 | 0.4421 | 1.02E-09 | 1331010    |
| Getting up | rs113240734 | A             | G            | 0.02  | 0.0023 | 0.1601 | 2.17E-13 | 1331010    |
| Getting up | rs148137538 | G             | A            | 0.04  | 0.0045 | 0.0231 | 1.48E-08 | 1331010    |
| Getting up | rs6691053   | T             | C            | 0.04  | 0.0045 | 0.2144 | 3.43E-05 | 1331010    |
| Getting up | rs75650221  | T             | C            | 0.04  | 0.0045 | 0.0381 | 3.93E-15 | 1331010    |
| Getting up | rs4652514   | C             | T            | -0.01 | 0.0019 | 0.3018 | 9.91E-06 | 1331010    |
| Getting up | rs12736689  | C             | T            | 0.05  | 0.0051 | 0.0297 | 1.66E-21 | 1331010    |
| Getting up | rs76048411  | T             | C            | 0.01  | 0.0017 | 0.4833 | 8.53E-07 | 1331010    |
| Getting up | rs2053457   | C             | T            | -0.02 | 0.002  | 0.2465 | 1.29E-12 | 1331010    |
| Getting up | rs1402121   | C             | T            | 0.01  | 0.0022 | 0.1998 | 6.66E-08 | 1331010    |
| Getting up | rs10180284  | T             | C            | 0.01  | 0.0022 | 0.4834 | 4.91E-05 | 1331010    |
| Getting up | rs4671328   | T             | G            | 0.01  | 0.0018 | 0.4478 | 1.06E-06 | 1331010    |
| Getting up | rs10175975  | T             | C            | 0.01  | 0.0023 | 0.179  | 3.30E-06 | 1331010    |
| Getting up | rs13393656  | A             | C            | 0.01  | 0.002  | 0.2426 | 2.10E-05 | 1331010    |
| Getting up | rs406952    | C             | T            | 0.01  | 0.0018 | 0.3765 | 1.20E-05 | 1331010    |
| Getting up | rs4853283   | G             | A            | -0.01 | 0.0017 | 0.4401 | 1.84E-13 | 1331010    |
| Getting up | rs1606803   | T             | C            | 0.01  | 0.0019 | 0.2871 | 3.22E-07 | 1331010    |
| Getting up | rs35333999  | T             | C            | -0.02 | 0.0024 | 0.043  | 3.44E-06 | 1331010    |
| Getting up | rs116298301 | T             | C            | -0.02 | 0.0024 | 0.0257 | 2.40E-11 | 1331010    |
| Getting up | rs4483990   | C             | A            | -0.02 | 0.0024 | 0.1549 | 6.40E-10 | 1331010    |
| Getting up | rs13116306  | T             | C            | -0.01 | 0.0018 | 0.42   | 1.76E-05 | 1331010    |
| Getting up | rs10470887  | G             | A            | -0.01 | 0.0017 | 0.4874 | 4.05E-05 | 1331010    |
| Getting up | rs9995419   | A             | G            | 0.01  | 0.002  | 0.2369 | 1.50E-05 | 1331010    |
| Getting up | rs79751662  | C             | G            | -0.02 | 0.0028 | 0.1067 | 2.32E-05 | 1331010    |
| Getting up | rs1459192   | T             | C            | -0.01 | 0.0018 | 0.3288 | 2.50E-05 | 1331010    |
| Getting up | rs12515274  | A             | G            | -0.01 | 0.002  | 0.2523 | 5.37E-07 | 1331010    |
| Getting up | rs4958316   | A             | C            | 0.02  | 0.0019 | 0.2883 | 3.69E-12 | 1331010    |
| Getting up | rs553108    | A             | G            | 0.01  | 0.0018 | 0.4159 | 3.12E-05 | 1331010    |
| Getting up | rs2653349   | A             | G            | 0.02  | 0.0021 | 0.213  | 8.45E-26 | 1331010    |
| Getting up | rs9399613   | T             | C            | -0.01 | 0.0019 | 0.2861 | 1.32E-05 | 1331010    |
| Getting up | rs3735478   | T             | G            | -0.01 | 0.0019 | 0.2908 | 1.57E-05 | 1331010    |
| Getting up | rs2944822   | T             | C            | 0.01  | 0.0017 | 0.4452 | 4.43E-06 | 1331010    |
| Getting up | rs16917522  | C             | T            | 0.01  | 0.0022 | 0.1827 | 1.12E-06 | 1331010    |
| Getting up | rs72663537  | G             | T            | -0.01 | 0.0026 | 0.1295 | 2.76E-05 | 1331010    |
| Getting up | rs77641763  | T             | C            | -0.02 | 0.0026 | 0.122  | 1.98E-08 | 1331010    |
| Getting up | rs4962716   | T             | C            | -0.02 | 0.0026 | 0.1258 | 1.82E-06 | 1331010    |
| Getting up | rs11229264  | A             | G            | -0.01 | 0.0019 | 0.2982 | 1.43E-07 | 1331010    |

|            |            |   |   |       |        |        |          |         |
|------------|------------|---|---|-------|--------|--------|----------|---------|
| Getting up | rs7297799  | T | C | -0.01 | 0.0018 | 0.3989 | 1.21E-09 | 1331010 |
| Getting up | rs11520042 | C | T | 0.01  | 0.0018 | 0.3455 | 7.90E-06 | 1331010 |
| Getting up | rs17464772 | A | G | 0.01  | 0.0018 | 0.3508 | 1.03E-08 | 1331010 |
| Getting up | rs2193749  | T | C | -0.01 | 0.0017 | 0.4947 | 1.84E-05 | 1331010 |
| Getting up | rs6581138  | A | G | 0.01  | 0.002  | 0.2434 | 2.30E-07 | 1331010 |
| Getting up | rs1017168  | A | C | -0.01 | 0.0018 | 0.3551 | 2.64E-05 | 1331010 |
| Getting up | rs74643199 | T | A | -0.01 | 0.0024 | 0.1538 | 1.25E-05 | 1331010 |
| Getting up | rs4884166  | A | G | -0.01 | 0.0022 | 0.1984 | 1.15E-05 | 1331010 |
| Getting up | rs7332608  | G | A | -0.03 | 0.0048 | 0.0338 | 4.55E-08 | 1331010 |
| Getting up | rs61963491 | G | A | -0.03 | 0.0048 | 0.0058 | 5.13E-06 | 1331010 |
| Getting up | rs6575012  | A | G | -0.01 | 0.0017 | 0.4819 | 2.57E-05 | 1331010 |
| Getting up | rs3935182  | G | C | 0.01  | 0.0018 | 0.4207 | 6.77E-09 | 1331010 |
| Getting up | rs1420607  | A | G | 0.01  | 0.0019 | 0.2713 | 1.57E-08 | 1331010 |
| Getting up | rs11642015 | T | C | 0.01  | 0.0018 | 0.4041 | 6.20E-08 | 1331010 |
| Getting up | rs1949072  | A | G | 0.01  | 0.0017 | 0.4342 | 2.48E-05 | 1331010 |
| Getting up | rs17822102 | G | A | 0.01  | 0.0018 | 0.3437 | 9.40E-07 | 1331010 |
| Getting up | rs11643192 | A | C | -0.01 | 0.0018 | 0.3893 | 1.30E-06 | 1331010 |
| Getting up | rs4790352  | G | A | -0.02 | 0.0031 | 0.0812 | 8.78E-06 | 1331010 |
| Getting up | rs3760185  | T | C | -0.01 | 0.002  | 0.2433 | 4.52E-05 | 1331010 |
| Getting up | rs7222039  | T | C | 0.01  | 0.0017 | 0.4467 | 3.42E-05 | 1331010 |
| Getting up | rs12150229 | G | A | 0.01  | 0.0021 | 0.2236 | 3.52E-06 | 1331010 |
| Getting up | rs77556405 | A | G | 0.02  | 0.0023 | 0.1727 | 1.59E-10 | 1331010 |
| Getting up | rs12601968 | T | G | -0.01 | 0.0018 | 0.3261 | 1.16E-06 | 1331010 |
| Getting up | rs4395148  | T | A | -0.01 | 0.0019 | 0.308  | 2.36E-05 | 1331010 |
| Getting up | rs8182491  | T | C | -0.02 | 0.0029 | 0.1005 | 1.18E-06 | 1331010 |
| Getting up | rs3746601  | C | A | 0.01  | 0.0018 | 0.3603 | 2.85E-05 | 1331010 |
| Getting up | rs11697690 | C | T | 0.01  | 0.0017 | 0.469  | 2.33E-05 | 1331010 |
| Getting up | rs74555583 | A | G | -0.02 | 0.0031 | 0.0855 | 3.04E-05 | 1331010 |
| Getting up | rs4634827  | G | A | 0.01  | 0.0021 | 0.3412 | 9.12E-07 | 1331010 |

Table S7. The summary information for instrumental variables of morningness.

| phenotype   | SNP         | effect_allele | other_allele | beta   | se    | eaf    | pval     | samplesize |
|-------------|-------------|---------------|--------------|--------|-------|--------|----------|------------|
| Morningness | rs150812083 | C             | G            | -0.153 | 0.016 | 0.9954 | 4.06E-19 | 1331010    |
| Morningness | rs61773390  | T             | G            | 0.029  | 0.003 | 0.1955 | 2.75E-24 | 1331010    |
| Morningness | rs228654    | A             | G            | -0.03  | 0.004 | 0.0975 | 2.65E-13 | 1331010    |
| Morningness | rs12065331  | T             | C            | -0.015 | 0.002 | 0.3068 | 1.51E-07 | 1331010    |
| Morningness | rs17448682  | T             | C            | 0.018  | 0.003 | 0.2315 | 4.04E-10 | 1331010    |
| Morningness | rs7543480   | T             | C            | 0.016  | 0.002 | 0.3447 | 6.90E-10 | 1331010    |
| Morningness | rs10916866  | A             | C            | -0.017 | 0.002 | 0.5887 | 2.39E-11 | 1331010    |
| Morningness | rs12140153  | T             | G            | -0.027 | 0.004 | 0.0877 | 4.62E-09 | 1331010    |
| Morningness | rs11208844  | A             | G            | -0.017 | 0.003 | 0.1379 | 2.81E-05 | 1331010    |
| Morningness | rs11162296  | C             | G            | 0.036  | 0.003 | 0.16   | 1.50E-31 | 1331010    |
| Morningness | rs10873936  | A             | G            | -0.013 | 0.002 | 0.3098 | 9.04E-06 | 1331010    |
| Morningness | rs17416934  | T             | C            | 0.013  | 0.002 | 0.616  | 5.93E-09 | 1331010    |
| Morningness | rs74802342  | A             | G            | -0.019 | 0.003 | 0.1125 | 2.09E-05 | 1331010    |
| Morningness | rs72720396  | A             | G            | -0.022 | 0.003 | 0.7706 | 3.29E-15 | 1331010    |
| Morningness | rs7522677   | T             | C            | 0.015  | 0.003 | 0.2099 | 7.91E-06 | 1331010    |
| Morningness | rs9437742   | C             | G            | -0.012 | 0.002 | 0.526  | 3.53E-05 | 1331010    |
| Morningness | rs12139650  | T             | G            | 0.015  | 0.003 | 0.8131 | 2.21E-05 | 1331010    |
| Morningness | rs10494041  | C             | G            | 0.02   | 0.003 | 0.8269 | 1.01E-09 | 1331010    |
| Morningness | rs35461065  | T             | C            | -0.012 | 0.002 | 0.5397 | 8.36E-06 | 1331010    |
| Morningness | rs956796    | A             | G            | -0.019 | 0.003 | 0.1092 | 2.42E-05 | 1331010    |
| Morningness | rs12401456  | A             | G            | -0.018 | 0.003 | 0.1667 | 7.98E-07 | 1331010    |
| Morningness | rs2794682   | T             | C            | 0.021  | 0.002 | 0.396  | 3.93E-19 | 1331010    |
| Morningness | rs2055975   | A             | C            | 0.016  | 0.002 | 0.2895 | 3.95E-09 | 1331010    |
| Morningness | rs148137538 | A             | G            | -0.041 | 0.007 | 0.9769 | 6.46E-06 | 1331010    |
| Morningness | rs75650221  | T             | C            | 0.034  | 0.006 | 0.0381 | 8.92E-10 | 1331010    |
| Morningness | rs13306728  | A             | G            | 0.03   | 0.004 | 0.9239 | 6.16E-11 | 1331010    |
| Morningness | rs7534480   | T             | C            | 0.017  | 0.002 | 0.385  | 2.87E-12 | 1331010    |
| Morningness | rs509476    | T             | C            | 0.099  | 0.006 | 0.03   | 7.41E-53 | 1331010    |
| Morningness | rs12746073  | T             | C            | 0.012  | 0.002 | 0.5259 | 1.73E-05 | 1331010    |
| Morningness | rs12025393  | A             | G            | -0.014 | 0.002 | 0.2653 | 1.82E-05 | 1331010    |
| Morningness | rs16839841  | T             | G            | 0.022  | 0.004 | 0.9188 | 2.69E-05 | 1331010    |
| Morningness | rs13011556  | C             | G            | -0.016 | 0.003 | 0.7622 | 7.73E-08 | 1331010    |
| Morningness | rs2712056   | T             | C            | 0.018  | 0.003 | 0.1845 | 1.57E-07 | 1331010    |
| Morningness | rs848552    | C             | G            | -0.013 | 0.002 | 0.4724 | 1.11E-06 | 1331010    |
| Morningness | rs62135536  | T             | C            | 0.035  | 0.006 | 0.0313 | 1.41E-05 | 1331010    |
| Morningness | rs2592199   | C             | G            | 0.022  | 0.003 | 0.7693 | 1.35E-11 | 1331010    |
| Morningness | rs10495976  | A             | T            | -0.017 | 0.002 | 0.6114 | 1.01E-10 | 1331010    |
| Morningness | rs10173945  | T             | G            | 0.013  | 0.002 | 0.6185 | 2.71E-06 | 1331010    |
| Morningness | rs72831198  | T             | C            | -0.016 | 0.003 | 0.8235 | 4.68E-05 | 1331010    |
| Morningness | rs1520524   | T             | C            | 0.025  | 0.004 | 0.1006 | 2.70E-09 | 1331010    |
| Morningness | rs10193431  | T             | C            | 0.013  | 0.002 | 0.5255 | 4.35E-06 | 1331010    |

|             |             |   |   |        |       |        |          |         |
|-------------|-------------|---|---|--------|-------|--------|----------|---------|
| Morningness | rs17049270  | T | C | -0.02  | 0.004 | 0.0959 | 1.96E-05 | 1331010 |
| Morningness | rs10175975  | T | C | 0.018  | 0.003 | 0.179  | 1.94E-07 | 1331010 |
| Morningness | rs359237    | T | C | -0.015 | 0.002 | 0.4678 | 9.18E-09 | 1331010 |
| Morningness | rs4672440   | T | G | 0.016  | 0.002 | 0.3465 | 5.09E-10 | 1331010 |
| Morningness | rs113851554 | T | G | -0.028 | 0.005 | 0.0506 | 1.32E-05 | 1331010 |
| Morningness | rs28362672  | A | G | -0.014 | 0.002 | 0.7406 | 3.21E-05 | 1331010 |
| Morningness | rs2706762   | T | C | -0.019 | 0.003 | 0.15   | 3.01E-07 | 1331010 |
| Morningness | rs7586062   | C | G | -0.022 | 0.002 | 0.4717 | 3.06E-21 | 1331010 |
| Morningness | rs10190053  | A | C | -0.013 | 0.002 | 0.3695 | 6.51E-06 | 1331010 |
| Morningness | rs75863239  | T | C | -0.023 | 0.004 | 0.9098 | 3.21E-05 | 1331010 |
| Morningness | rs62172117  | A | G | -0.019 | 0.002 | 0.3572 | 1.43E-14 | 1331010 |
| Morningness | rs2731553   | A | C | -0.016 | 0.002 | 0.7544 | 1.10E-07 | 1331010 |
| Morningness | rs7579662   | A | G | -0.012 | 0.002 | 0.3919 | 2.24E-05 | 1331010 |
| Morningness | rs13004345  | T | C | -0.012 | 0.002 | 0.6523 | 3.76E-05 | 1331010 |
| Morningness | rs11677484  | T | G | 0.015  | 0.002 | 0.2531 | 6.25E-07 | 1331010 |
| Morningness | rs4850712   | T | G | 0.013  | 0.002 | 0.3221 | 9.40E-06 | 1331010 |
| Morningness | rs6716898   | A | G | 0.021  | 0.002 | 0.4838 | 2.32E-19 | 1331010 |
| Morningness | rs184033703 | A | G | 0.032  | 0.005 | 0.0576 | 9.65E-07 | 1331010 |
| Morningness | rs35333999  | T | C | -0.047 | 0.005 | 0.043  | 5.10E-16 | 1331010 |
| Morningness | rs77942338  | T | C | -0.056 | 0.007 | 0.9737 | 1.40E-13 | 1331010 |
| Morningness | rs12477345  | T | C | -0.013 | 0.002 | 0.6316 | 1.81E-06 | 1331010 |
| Morningness | rs11900963  | A | T | 0.045  | 0.004 | 0.9138 | 3.22E-29 | 1331010 |
| Morningness | rs62182135  | A | C | -0.013 | 0.002 | 0.3305 | 7.80E-06 | 1331010 |
| Morningness | rs17786957  | C | G | -0.018 | 0.003 | 0.1633 | 6.05E-10 | 1331010 |
| Morningness | rs7428484   | A | G | 0.013  | 0.002 | 0.6734 | 1.97E-05 | 1331010 |
| Morningness | rs56411893  | A | G | -0.021 | 0.003 | 0.8413 | 1.83E-09 | 1331010 |
| Morningness | rs62263597  | A | G | 0.028  | 0.004 | 0.0845 | 4.79E-10 | 1331010 |
| Morningness | rs11714286  | A | G | 0.014  | 0.002 | 0.5372 | 9.05E-08 | 1331010 |
| Morningness | rs7652260   | C | G | 0.017  | 0.003 | 0.8411 | 1.99E-08 | 1331010 |
| Morningness | rs67000219  | T | C | -0.019 | 0.003 | 0.1137 | 2.68E-08 | 1331010 |
| Morningness | rs9876864   | A | T | 0.016  | 0.002 | 0.4128 | 9.20E-11 | 1331010 |
| Morningness | rs55753638  | T | C | -0.022 | 0.003 | 0.8786 | 2.86E-08 | 1331010 |
| Morningness | rs1800828   | C | G | 0.014  | 0.002 | 0.7473 | 5.32E-06 | 1331010 |
| Morningness | rs6799356   | A | C | 0.014  | 0.003 | 0.7538 | 4.14E-08 | 1331010 |
| Morningness | rs2699869   | A | C | 0.013  | 0.002 | 0.454  | 5.06E-06 | 1331010 |
| Morningness | rs1109088   | A | G | 0.013  | 0.002 | 0.5738 | 2.60E-06 | 1331010 |
| Morningness | rs6769642   | A | C | 0.016  | 0.002 | 0.4815 | 2.80E-10 | 1331010 |
| Morningness | rs3850174   | A | T | -0.014 | 0.002 | 0.2541 | 9.06E-06 | 1331010 |
| Morningness | rs6443788   | A | C | -0.015 | 0.002 | 0.2886 | 1.04E-06 | 1331010 |
| Morningness | rs6443810   | C | G | 0.015  | 0.002 | 0.6856 | 2.47E-07 | 1331010 |
| Morningness | rs6778003   | T | G | 0.016  | 0.002 | 0.2941 | 4.94E-09 | 1331010 |
| Morningness | rs7617588   | T | C | -0.021 | 0.003 | 0.8605 | 3.49E-08 | 1331010 |
| Morningness | rs9683585   | C | G | -0.012 | 0.002 | 0.5608 | 1.79E-05 | 1331010 |

|             |             |   |   |        |       |        |          |         |
|-------------|-------------|---|---|--------|-------|--------|----------|---------|
| Morningness | rs56040212  | A | G | -0.014 | 0.003 | 0.2421 | 2.20E-05 | 1331010 |
| Morningness | rs28634184  | T | C | -0.014 | 0.002 | 0.251  | 2.31E-05 | 1331010 |
| Morningness | rs57180764  | A | G | 0.017  | 0.003 | 0.7676 | 3.22E-08 | 1331010 |
| Morningness | rs4241964   | T | G | -0.015 | 0.002 | 0.5248 | 3.54E-09 | 1331010 |
| Morningness | rs7449161   | T | G | 0.013  | 0.002 | 0.5226 | 2.20E-06 | 1331010 |
| Morningness | rs3797051   | T | C | 0.015  | 0.003 | 0.7613 | 1.48E-06 | 1331010 |
| Morningness | rs542867945 | A | C | 0.49   | 0.089 | 0.9998 | 4.29E-05 | 1331010 |
| Morningness | rs66507804  | T | C | -0.017 | 0.003 | 0.7946 | 1.47E-07 | 1331010 |
| Morningness | rs12657776  | A | G | 0.019  | 0.002 | 0.7482 | 3.51E-11 | 1331010 |
| Morningness | rs304137    | A | G | 0.016  | 0.002 | 0.5225 | 3.06E-11 | 1331010 |
| Morningness | rs40465     | T | G | -0.013 | 0.002 | 0.6702 | 2.46E-05 | 1331010 |
| Morningness | rs286808    | T | C | 0.013  | 0.002 | 0.4746 | 3.87E-06 | 1331010 |
| Morningness | rs10052000  | C | G | 0.02   | 0.002 | 0.3226 | 7.50E-16 | 1331010 |
| Morningness | rs2910032   | T | C | 0.019  | 0.002 | 0.5184 | 6.18E-15 | 1331010 |
| Morningness | rs42210     | C | G | -0.014 | 0.002 | 0.7134 | 3.53E-06 | 1331010 |
| Morningness | rs335433    | T | C | -0.013 | 0.002 | 0.4568 | 2.29E-06 | 1331010 |
| Morningness | rs9395520   | T | C | 0.02   | 0.002 | 0.3042 | 1.60E-15 | 1331010 |
| Morningness | rs139757732 | T | C | -0.029 | 0.005 | 0.956  | 2.52E-05 | 1331010 |
| Morningness | rs9295795   | T | C | -0.026 | 0.005 | 0.9431 | 1.90E-05 | 1331010 |
| Morningness | rs486416    | A | G | -0.013 | 0.002 | 0.6376 | 6.07E-06 | 1331010 |
| Morningness | rs734597    | A | G | 0.016  | 0.003 | 0.1696 | 1.62E-08 | 1331010 |
| Morningness | rs11969918  | A | G | -0.013 | 0.002 | 0.431  | 1.97E-06 | 1331010 |
| Morningness | rs144870624 | T | C | -0.039 | 0.007 | 0.9759 | 1.92E-05 | 1331010 |
| Morningness | rs2653349   | A | G | 0.031  | 0.003 | 0.213  | 1.03E-29 | 1331010 |
| Morningness | rs9396083   | A | G | -0.017 | 0.002 | 0.4077 | 2.45E-12 | 1331010 |
| Morningness | rs2881955   | T | C | 0.016  | 0.002 | 0.2777 | 5.64E-08 | 1331010 |
| Morningness | rs9375352   | A | T | 0.014  | 0.002 | 0.2672 | 2.03E-05 | 1331010 |
| Morningness | rs4557564   | A | G | 0.025  | 0.004 | 0.9296 | 2.15E-06 | 1331010 |
| Morningness | rs6935086   | T | C | 0.02   | 0.003 | 0.8871 | 5.87E-09 | 1331010 |
| Morningness | rs827751    | A | G | 0.019  | 0.002 | 0.3281 | 2.21E-17 | 1331010 |
| Morningness | rs9479402   | T | C | -0.102 | 0.01  | 0.9893 | 1.35E-19 | 1331010 |
| Morningness | rs62436127  | C | G | 0.026  | 0.003 | 0.1596 | 1.43E-15 | 1331010 |
| Morningness | rs9348050   | T | C | 0.013  | 0.002 | 0.4891 | 2.00E-06 | 1331010 |
| Morningness | rs16873715  | A | T | -0.015 | 0.003 | 0.7564 | 4.42E-05 | 1331010 |
| Morningness | rs56382918  | T | C | 0.018  | 0.002 | 0.7436 | 1.13E-09 | 1331010 |
| Morningness | rs10236197  | T | C | 0.014  | 0.002 | 0.6303 | 2.03E-07 | 1331010 |
| Morningness | rs56049037  | A | G | -0.017 | 0.002 | 0.2874 | 2.28E-09 | 1331010 |
| Morningness | rs4245555   | T | C | -0.018 | 0.002 | 0.5872 | 1.96E-12 | 1331010 |
| Morningness | rs2190500   | C | G | -0.022 | 0.004 | 0.1025 | 1.97E-07 | 1331010 |
| Morningness | rs2138759   | A | G | 0.014  | 0.002 | 0.297  | 1.75E-06 | 1331010 |
| Morningness | rs2922966   | A | G | 0.025  | 0.003 | 0.8357 | 1.11E-17 | 1331010 |
| Morningness | rs202157    | T | C | -0.018 | 0.002 | 0.7019 | 1.21E-11 | 1331010 |
| Morningness | rs73405966  | T | G | 0.019  | 0.003 | 0.8233 | 3.61E-06 | 1331010 |

|             |             |   |   |        |       |        |          |         |
|-------------|-------------|---|---|--------|-------|--------|----------|---------|
| Morningness | rs1047998   | T | C | 0.015  | 0.002 | 0.2527 | 3,39E-09 | 1331010 |
| Morningness | rs77655131  | T | C | -0.022 | 0.003 | 0.1223 | 4.65E-08 | 1331010 |
| Morningness | rs60984271  | A | T | -0.02  | 0.003 | 0.8144 | 2.91E-07 | 1331010 |
| Morningness | rs112613078 | A | G | -0.025 | 0.003 | 0.81   | 1.55E-17 | 1331010 |
| Morningness | rs17474942  | T | C | 0.062  | 0.007 | 0.0216 | 4.07E-14 | 1331010 |
| Morningness | rs148266530 | T | C | 0.044  | 0.008 | 0.0203 | 1.23E-05 | 1331010 |
| Morningness | rs79055896  | A | G | 0.033  | 0.005 | 0.9426 | 4,65E-10 | 1331010 |
| Morningness | rs6944123   | T | G | 0.018  | 0.002 | 0.3146 | 1.83E-12 | 1331010 |
| Morningness | rs10262462  | A | G | -0.015 | 0.002 | 0.3974 | 3.18E-09 | 1331010 |
| Morningness | rs6978514   | T | C | -0.013 | 0.002 | 0.559  | 4.87E-05 | 1331010 |
| Morningness | rs2971970   | T | G | 0.017  | 0.003 | 0.2177 | 2,23E-11 | 1331010 |
| Morningness | rs35748596  | T | G | -0.016 | 0.002 | 0.6423 | 2.37E-09 | 1331010 |
| Morningness | rs34344642  | T | G | -0.024 | 0.004 | 0.0783 | 2.88E-06 | 1331010 |
| Morningness | rs12541362  | A | T | -0.018 | 0.002 | 0.6511 | 5.55E-12 | 1331010 |
| Morningness | rs1996866   | A | T | -0.016 | 0.003 | 0.7498 | 2.31E-05 | 1331010 |
| Morningness | rs1919346   | A | G | 0.012  | 0.002 | 0.5251 | 1.30E-05 | 1331010 |
| Morningness | rs11988076  | A | G | -0.019 | 0.003 | 0.8359 | 1.82E-08 | 1331010 |
| Morningness | rs6472936   | T | C | 0.018  | 0.003 | 0.7788 | 5.16E-09 | 1331010 |
| Morningness | rs1110275   | T | C | 0.02   | 0.004 | 0.9058 | 4.05E-05 | 1331010 |
| Morningness | rs34578339  | A | T | -0.016 | 0.003 | 0.843  | 2.84E-05 | 1331010 |
| Morningness | rs17748165  | A | G | 0.014  | 0.002 | 0.7422 | 3.05E-05 | 1331010 |
| Morningness | rs72673588  | C | G | -0.017 | 0.003 | 0.8152 | 1.26E-06 | 1331010 |
| Morningness | rs3100052   | A | G | 0.013  | 0.002 | 0.3874 | 1.30E-05 | 1331010 |
| Morningness | rs2737245   | T | G | 0.018  | 0.002 | 0.2779 | 2.94E-11 | 1331010 |
| Morningness | rs10758971  | T | C | 0.012  | 0.002 | 0.652  | 4,58E-08 | 1331010 |
| Morningness | rs1323591   | T | C | -0.016 | 0.002 | 0.3243 | 2.11E-09 | 1331010 |
| Morningness | rs1936637   | T | C | 0.013  | 0.002 | 0.6601 | 9.25E-06 | 1331010 |
| Morningness | rs10973160  | T | C | -0.013 | 0.002 | 0.3195 | 1.71E-05 | 1331010 |
| Morningness | rs2291589   | T | G | 0.018  | 0.002 | 0.6226 | 1.65E-13 | 1331010 |
| Morningness | rs78146603  | T | C | 0.033  | 0.006 | 0.9618 | 2,93E-09 | 1331010 |
| Morningness | rs77598468  | A | C | -0.042 | 0.006 | 0.0343 | 1.05E-09 | 1331010 |
| Morningness | rs72742394  | T | C | 0.021  | 0.004 | 0.9017 | 7.04E-06 | 1331010 |
| Morningness | rs4565536   | A | C | -0.012 | 0.002 | 0.4993 | 4.97E-05 | 1331010 |
| Morningness | rs10797119  | T | C | -0.013 | 0.002 | 0.4633 | 2.80E-06 | 1331010 |
| Morningness | rs10818834  | T | C | 0.014  | 0.002 | 0.7344 | 5.24E-06 | 1331010 |
| Morningness | rs28365587  | A | G | -0.013 | 0.002 | 0.5141 | 3.60E-06 | 1331010 |
| Morningness | rs10448340  | T | G | -0.013 | 0.002 | 0.6806 | 9.07E-06 | 1331010 |
| Morningness | rs28458909  | T | C | -0.03  | 0.004 | 0.1224 | 1.95E-13 | 1331010 |
| Morningness | rs1750785   | A | G | 0.014  | 0.002 | 0.2638 | 3.52E-06 | 1331010 |
| Morningness | rs9416744   | A | C | 0.017  | 0.002 | 0.2561 | 1.47E-09 | 1331010 |
| Morningness | rs7910164   | A | G | 0.012  | 0.002 | 0.6423 | 4,83E-08 | 1331010 |
| Morningness | rs76518095  | T | C | 0.023  | 0.004 | 0.0751 | 1.00E-05 | 1331010 |
| Morningness | rs9795439   | A | G | 0.018  | 0.003 | 0.1963 | 6,68E-09 | 1331010 |



|             |             |   |   |        |       |        |          |         |
|-------------|-------------|---|---|--------|-------|--------|----------|---------|
| Morningness | rs925947    | T | G | 0.016  | 0.003 | 0.2016 | 9.64E-07 | 1331010 |
| Morningness | rs605765    | T | C | -0.012 | 0.002 | 0.6107 | 3.13E-05 | 1331010 |
| Morningness | rs12799529  | T | C | 0.018  | 0.003 | 0.7583 | 5.13E-10 | 1331010 |
| Morningness | rs11032362  | A | G | 0.031  | 0.004 | 0.0911 | 3.46E-14 | 1331010 |
| Morningness | rs34239319  | T | G | 0.024  | 0.004 | 0.1018 | 6.45E-09 | 1331010 |
| Morningness | rs4319473   | A | G | 0.017  | 0.003 | 0.1573 | 9.45E-06 | 1331010 |
| Morningness | rs6485751   | C | G | -0.016 | 0.003 | 0.2097 | 1.44E-06 | 1331010 |
| Morningness | rs11039308  | A | G | 0.014  | 0.002 | 0.4083 | 4.94E-11 | 1331010 |
| Morningness | rs11605681  | A | G | 0.027  | 0.005 | 0.0563 | 1.21E-05 | 1331010 |
| Morningness | rs3168135   | A | G | -0.017 | 0.003 | 0.2408 | 3.64E-09 | 1331010 |
| Morningness | rs4008953   | A | G | -0.016 | 0.002 | 0.7123 | 3.23E-08 | 1331010 |
| Morningness | rs4237555   | T | C | 0.012  | 0.002 | 0.5272 | 4.19E-05 | 1331010 |
| Morningness | rs4936290   | A | C | -0.013 | 0.002 | 0.6508 | 1.18E-05 | 1331010 |
| Morningness | rs577924    | T | C | 0.012  | 0.002 | 0.5342 | 2.07E-05 | 1331010 |
| Morningness | rs1174510   | A | G | 0.012  | 0.002 | 0.6244 | 4.86E-05 | 1331010 |
| Morningness | rs11611435  | T | C | 0.012  | 0.002 | 0.5528 | 4.00E-05 | 1331010 |
| Morningness | rs13377754  | T | C | 0.024  | 0.002 | 0.6123 | 7.84E-24 | 1331010 |
| Morningness | rs11610973  | T | C | -0.024 | 0.004 | 0.8737 | 3.08E-08 | 1331010 |
| Morningness | rs7313852   | A | G | -0.025 | 0.002 | 0.435  | 1.02E-26 | 1331010 |
| Morningness | rs117554039 | A | G | 0.021  | 0.004 | 0.9121 | 4.59E-05 | 1331010 |
| Morningness | rs12828063  | T | G | -0.014 | 0.002 | 0.691  | 4.93E-06 | 1331010 |
| Morningness | rs11183201  | T | C | -0.017 | 0.002 | 0.4925 | 1.60E-11 | 1331010 |
| Morningness | rs671255    | A | G | -0.014 | 0.002 | 0.7505 | 1.42E-05 | 1331010 |
| Morningness | rs7299922   | A | G | 0.013  | 0.002 | 0.6334 | 8.56E-06 | 1331010 |
| Morningness | rs9788226   | C | G | 0.022  | 0.003 | 0.8781 | 1.25E-08 | 1331010 |
| Morningness | rs7138306   | A | G | 0.013  | 0.002 | 0.4693 | 8.86E-10 | 1331010 |
| Morningness | rs7488974   | A | G | 0.016  | 0.002 | 0.3976 | 1.81E-10 | 1331010 |
| Morningness | rs10861694  | T | C | 0.014  | 0.002 | 0.5641 | 2.60E-07 | 1331010 |
| Morningness | rs77531286  | T | C | -0.017 | 0.003 | 0.8517 | 1.40E-05 | 1331010 |
| Morningness | rs4102203   | T | C | 0.024  | 0.003 | 0.8936 | 7.80E-09 | 1331010 |
| Morningness | rs61963123  | T | C | 0.017  | 0.003 | 0.7847 | 2.33E-07 | 1331010 |
| Morningness | rs9597250   | A | C | -0.019 | 0.003 | 0.188  | 2.88E-09 | 1331010 |
| Morningness | rs2321993   | A | G | -0.014 | 0.002 | 0.5691 | 2.59E-08 | 1331010 |
| Morningness | rs2593487   | A | G | -0.014 | 0.002 | 0.3388 | 2.88E-07 | 1331010 |
| Morningness | rs9565309   | T | C | 0.066  | 0.006 | 0.9662 | 1.26E-25 | 1331010 |
| Morningness | rs61963491  | A | G | 0.112  | 0.016 | 0.9942 | 1.60E-09 | 1331010 |
| Morningness | rs7337911   | A | G | 0.015  | 0.002 | 0.7471 | 1.00E-06 | 1331010 |
| Morningness | rs9521184   | T | C | 0.013  | 0.002 | 0.4871 | 8.34E-07 | 1331010 |
| Morningness | rs11157143  | A | G | -0.015 | 0.002 | 0.7264 | 8.23E-07 | 1331010 |
| Morningness | rs56376592  | A | C | 0.017  | 0.003 | 0.8217 | 1.40E-06 | 1331010 |
| Morningness | rs4899502   | A | G | -0.016 | 0.002 | 0.6869 | 1.61E-08 | 1331010 |
| Morningness | rs12432176  | A | C | 0.013  | 0.002 | 0.3781 | 1.47E-08 | 1331010 |
| Morningness | rs2701524   | T | C | 0.013  | 0.002 | 0.5871 | 5.39E-06 | 1331010 |

|             |             |   |   |        |       |        |          |         |
|-------------|-------------|---|---|--------|-------|--------|----------|---------|
| Morningness | rs59986227  | C | G | -0.015 | 0.002 | 0.7456 | 5.36E-06 | 1331010 |
| Morningness | rs12442008  | T | C | 0.014  | 0.002 | 0.2521 | 3.36E-05 | 1331010 |
| Morningness | rs11852820  | C | G | -0.014 | 0.002 | 0.6589 | 5.76E-07 | 1331010 |
| Morningness | rs2304467   | C | G | -0.012 | 0.002 | 0.6026 | 3.91E-08 | 1331010 |
| Morningness | rs7196720   | T | C | 0.013  | 0.002 | 0.486  | 4.32E-06 | 1331010 |
| Morningness | rs12927162  | A | G | 0.028  | 0.002 | 0.7237 | 2.11E-29 | 1331010 |
| Morningness | rs1421085   | T | C | -0.023 | 0.002 | 0.5961 | 1.39E-22 | 1331010 |
| Morningness | rs1110698   | A | C | -0.022 | 0.004 | 0.0788 | 2.89E-05 | 1331010 |
| Morningness | rs2398144   | A | C | -0.021 | 0.002 | 0.3947 | 2.42E-18 | 1331010 |
| Morningness | rs8044054   | T | C | 0.015  | 0.002 | 0.3889 | 3.87E-09 | 1331010 |
| Morningness | rs11641811  | A | C | -0.013 | 0.002 | 0.5218 | 5.77E-07 | 1331010 |
| Morningness | rs17604349  | A | G | -0.022 | 0.003 | 0.1792 | 1.21E-12 | 1331010 |
| Morningness | rs58356259  | T | C | -0.013 | 0.002 | 0.4687 | 2.38E-06 | 1331010 |
| Morningness | rs2518022   | T | C | 0.032  | 0.004 | 0.0856 | 1.53E-13 | 1331010 |
| Morningness | rs1242490   | C | G | -0.018 | 0.002 | 0.7456 | 7.33E-14 | 1331010 |
| Morningness | rs2232839   | T | C | -0.025 | 0.003 | 0.2113 | 2.41E-18 | 1331010 |
| Morningness | rs9915731   | A | T | -0.013 | 0.002 | 0.2703 | 2.80E-05 | 1331010 |
| Morningness | rs225289    | T | C | 0.016  | 0.003 | 0.1693 | 1.24E-05 | 1331010 |
| Morningness | rs72828815  | T | C | 0.016  | 0.003 | 0.1849 | 6.08E-06 | 1331010 |
| Morningness | rs117974417 | C | G | -0.018 | 0.003 | 0.8477 | 1.54E-06 | 1331010 |
| Morningness | rs6504758   | A | G | -0.014 | 0.002 | 0.4645 | 9.83E-08 | 1331010 |
| Morningness | rs9898091   | T | C | 0.038  | 0.006 | 0.9604 | 6.88E-09 | 1331010 |
| Morningness | rs8072058   | A | T | -0.015 | 0.003 | 0.7822 | 1.38E-05 | 1331010 |
| Morningness | rs17682747  | A | G | 0.014  | 0.003 | 0.2312 | 4.69E-05 | 1331010 |
| Morningness | rs2916142   | T | C | 0.015  | 0.002 | 0.4565 | 7.63E-09 | 1331010 |
| Morningness | rs10491171  | C | G | 0.019  | 0.003 | 0.865  | 3.62E-06 | 1331010 |
| Morningness | rs487952    | A | G | 0.013  | 0.002 | 0.5656 | 4.43E-06 | 1331010 |
| Morningness | rs974552    | A | G | -0.022 | 0.003 | 0.8085 | 1.40E-12 | 1331010 |
| Morningness | rs1013987   | T | C | -0.015 | 0.002 | 0.4042 | 1.36E-08 | 1331010 |
| Morningness | rs4239386   | A | T | -0.019 | 0.002 | 0.3342 | 2.06E-17 | 1331010 |
| Morningness | rs12969848  | T | C | 0.017  | 0.002 | 0.5294 | 1.52E-12 | 1331010 |
| Morningness | rs989885    | A | G | -0.024 | 0.004 | 0.9368 | 3.83E-05 | 1331010 |
| Morningness | rs9956387   | A | T | -0.014 | 0.002 | 0.4963 | 1.38E-07 | 1331010 |
| Morningness | rs17596722  | T | C | -0.018 | 0.003 | 0.2006 | 3.24E-08 | 1331010 |
| Morningness | rs66791238  | T | C | -0.015 | 0.003 | 0.7917 | 2.93E-05 | 1331010 |
| Morningness | rs12959908  | T | C | -0.012 | 0.002 | 0.5776 | 1.10E-05 | 1331010 |
| Morningness | rs8094095   | A | G | 0.018  | 0.003 | 0.1496 | 5.92E-06 | 1331010 |
| Morningness | rs9964420   | A | C | -0.022 | 0.002 | 0.301  | 4.03E-18 | 1331010 |
| Morningness | rs11152350  | A | C | -0.015 | 0.002 | 0.4704 | 1.07E-09 | 1331010 |
| Morningness | rs9958145   | A | G | -0.015 | 0.003 | 0.2009 | 4.26E-05 | 1331010 |
| Morningness | rs10402849  | T | C | 0.016  | 0.003 | 0.2008 | 6.73E-06 | 1331010 |
| Morningness | rs3843751   | T | C | 0.013  | 0.002 | 0.6642 | 6.33E-06 | 1331010 |
| Morningness | rs9636202   | A | G | -0.013 | 0.002 | 0.2653 | 3.53E-05 | 1331010 |

|             |            |   |   |        |       |        |          |         |
|-------------|------------|---|---|--------|-------|--------|----------|---------|
| Morningness | rs12481462 | T | C | 0.012  | 0.002 | 0.3727 | 4.36E-05 | 1331010 |
| Morningness | rs78095690 | T | C | -0.013 | 0.002 | 0.5635 | 5.75E-06 | 1331010 |
| Morningness | rs6131942  | A | G | -0.015 | 0.002 | 0.4196 | 7.63E-09 | 1331010 |
| Morningness | rs1737893  | T | C | -0.014 | 0.002 | 0.3779 | 1.37E-06 | 1331010 |
| Morningness | rs2072727  | T | C | 0.012  | 0.002 | 0.4359 | 3.46E-05 | 1331010 |
| Morningness | rs695459   | T | C | -0.013 | 0.002 | 0.3886 | 6.59E-06 | 1331010 |
| Morningness | rs28580373 | A | G | 0.014  | 0.003 | 0.2317 | 3.25E-05 | 1331010 |
| Morningness | rs11705370 | A | T | -0.019 | 0.002 | 0.5981 | 3.43E-12 | 1331010 |
| Morningness | rs9611302  | A | G | -0.019 | 0.003 | 0.1142 | 8.37E-06 | 1331010 |
| Morningness | rs55715427 | C | G | -0.022 | 0.004 | 0.097  | 1,35E-09 | 1331010 |
| Morningness | rs4822107  | A | G | 0.012  | 0.002 | 0.5065 | 2.23E-05 | 1331010 |
| Morningness | rs2294203  | A | G | 0.013  | 0.002 | 0.6796 | 2.97E-05 | 1331010 |
| Morningness | rs196973   | A | C | -0.015 | 0.002 | 0.5395 | 5.95E-06 | 1331010 |
| Morningness | rs12844850 | A | G | -0.013 | 0.002 | 0.3614 | 3.71E-17 | 1331010 |
| Morningness | rs213443   | C | G | 0.013  | 0.002 | 0.4522 | 6,36E-10 | 1331010 |
| Morningness | rs4375148  | T | C | 0.015  | 0.003 | 0.769  | 2.18E-09 | 1331010 |
| Morningness | rs6621219  | T | C | 0.026  | 0.003 | 0.1754 | 1.07E-07 | 1331010 |
| Morningness | rs5987510  | A | G | 0.014  | 0.002 | 0.3743 | 2.09E-06 | 1331010 |

Table S8. The summary information for instrumental variables of snoring.

| phenotype | SNP        | Effect allele | Other allele | beta | se       | eaf    | P val    | Sample size |
|-----------|------------|---------------|--------------|------|----------|--------|----------|-------------|
| Snoring   | rs35915391 | C             | G            | 0.97 | 0.005214 | 0.3513 | 2.25E-08 | 1331010     |
| Snoring   | rs35562935 | A             | G            | 1.06 | 0.009454 | 0.0746 | 1.69E-08 | 1331010     |
| Snoring   | rs10190879 | T             | C            | 0.97 | 0.005481 | 0.298  | 1.81E-08 | 1331010     |
| Snoring   | rs72906130 | G             | C            | 1.06 | 0.007283 | 0.1345 | 3.50E-14 | 1331010     |
| Snoring   | rs9309771  | A             | G            | 1.03 | 0.005018 | 0.4521 | 5.65E-09 | 1331010     |
| Snoring   | rs34811474 | A             | G            | 0.96 | 0.005929 | 0.2308 | 4.22E-11 | 1331010     |
| Snoring   | rs6855873  | T             | C            | 1.03 | 0.005822 | 0.2411 | 2.08E-08 | 1331010     |
| Snoring   | rs2307111  | C             | T            | 0.97 | 0.005108 | 0.3946 | 1.34E-11 | 1331010     |
| Snoring   | rs10062026 | A             | G            | 0.97 | 0.005204 | 0.3591 | 2.08E-08 | 1331010     |
| Snoring   | rs745558   | A             | G            | 0.97 | 0.005347 | 0.3279 | 2.66E-10 | 1331010     |
| Snoring   | rs947612   | G             | A            | 1.03 | 0.005761 | 0.2474 | 9.92E-09 | 1331010     |
| Snoring   | rs17060460 | G             | A            | 1.03 | 0.005955 | 0.2256 | 1.43E-08 | 1331010     |
| Snoring   | rs9389081  | A             | T            | 0.95 | 0.00946  | 0.0764 | 4.37E-08 | 1331010     |
| Snoring   | rs2981329  | C             | T            | 1.03 | 0.00579  | 0.2551 | 7.74E-09 | 1331010     |
| Snoring   | rs7007887  | T             | C            | 1.04 | 0.005024 | 0.4339 | 9.88E-14 | 1331010     |
| Snoring   | rs4523230  | A             | T            | 0.97 | 0.005572 | 0.2832 | 1.67E-09 | 1331010     |
| Snoring   | rs1016013  | A             | G            | 0.97 | 0.005145 | 0.4036 | 7.22E-10 | 1331010     |
| Snoring   | rs11256034 | T             | C            | 1.04 | 0.005772 | 0.2478 | 4.67E-11 | 1331010     |
| Snoring   | rs2049045  | C             | G            | 0.96 | 0.006417 | 0.1866 | 8.87E-11 | 1331010     |
| Snoring   | rs10878269 | T             | C            | 1.04 | 0.005176 | 0.3647 | 3.76E-13 | 1331010     |
| Snoring   | rs12427782 | T             | G            | 0.97 | 0.005055 | 0.491  | 5.77E-09 | 1331010     |
| Snoring   | rs2762049  | C             | G            | 1.04 | 0.005107 | 0.3914 | 8.69E-12 | 1331010     |
| Snoring   | rs2408111  | A             | T            | 1.05 | 0.007367 | 0.1329 | 3.00E-09 | 1331010     |
| Snoring   | rs592333   | G             | A            | 1.04 | 0.005012 | 0.4433 | 1.08E-16 | 1331010     |
| Snoring   | rs2664299  | C             | T            | 0.97 | 0.005067 | 0.4187 | 4.48E-11 | 1331010     |
| Snoring   | rs9933881  | C             | T            | 1.06 | 0.00948  | 0.0743 | 8.94E-09 | 1331010     |
| Snoring   | rs732172   | T             | C            | 1.03 | 0.005154 | 0.3709 | 1.35E-09 | 1331010     |
| Snoring   | rs8047587  | T             | G            | 1.03 | 0.005036 | 0.4396 | 2.13E-09 | 1331010     |
| Snoring   | rs7217107  | G             | A            | 0.97 | 0.005429 | 0.3111 | 3.52E-09 | 1331010     |
| Snoring   | rs12449843 | A             | G            | 0.97 | 0.005151 | 0.378  | 4.45E-10 | 1331010     |
| Snoring   | rs1641511  | G             | A            | 1.03 | 0.005956 | 0.2355 | 1.40E-08 | 1331010     |
| Snoring   | rs57222984 | G             | A            | 1.04 | 0.005824 | 0.2423 | 3.03E-11 | 1331010     |
| Snoring   | rs4792897  | G             | A            | 0.96 | 0.006603 | 0.1738 | 2.74E-08 | 1331010     |
| Snoring   | rs1563304  | T             | C            | 1.04 | 0.006506 | 0.1782 | 3.72E-08 | 1331010     |
| Snoring   | rs2924251  | A             | G            | 1.03 | 0.005307 | 0.3325 | 5.17E-09 | 1331010     |
| Snoring   | rs79275904 | T             | C            | 0.95 | 0.008855 | 0.0882 | 5.64E-09 | 1331010     |
| Snoring   | rs180107   | A             | T            | 0.97 | 0.00507  | 0.4093 | 3.86E-09 | 1331010     |
| Snoring   | rs4987719  | T             | C            | 1.08 | 0.01368  | 0.0338 | 3.59E-08 | 1331010     |
| Snoring   | rs10415992 | G             | C            | 0.95 | 0.008565 | 0.0947 | 8.14E-09 | 1331010     |
| Snoring   | rs34107769 | C             | T            | 0.97 | 0.005485 | 0.2932 | 9.93E-09 | 1331010     |
| Snoring   | rs6099273  | T             | C            | 1.03 | 0.005762 | 0.2496 | 1.22E-08 | 1331010     |

|         |         |   |   |      |          |       |          |         |
|---------|---------|---|---|------|----------|-------|----------|---------|
| Snoring | rs17435 | T | A | 0.96 | 0.007573 | 0.181 | 3.80E-08 | 1331010 |
|---------|---------|---|---|------|----------|-------|----------|---------|

eaf: effect allele frequency; SE: standard error.

TableS9. SNPs used as instrumental variables from sleep traits and RA GWASs ( $P < 5 \times 10^{-8}$ ).

| Exposure    | SNP        | Effect allele | Other allele | Exposure    |             |          | Outcome     |           |           | Proxy SNP | Target effect allele | Target other allele |
|-------------|------------|---------------|--------------|-------------|-------------|----------|-------------|-----------|-----------|-----------|----------------------|---------------------|
|             |            |               |              | Beta        | SE          | P value  | Beta        | SE        | P value   |           |                      |                     |
| Short sleep | rs11763750 | G             | A            | 0.035367144 | 0.006052001 | 5.10E-09 | 0.0304592   | 0.021678  | 0.16      | -         | -                    | -                   |
|             | rs1229762  | T             | C            | 0.037295785 | 0.005240102 | 1.10E-12 | 0.0392207   | 0.0197456 | 0.0470002 | -         | -                    | -                   |
|             | rs12518468 | C             | T            | 0.031498667 | 0.005470199 | 8.50E-09 | 0.0100503   | 0.0164003 | 0.54      | -         | -                    | -                   |
|             | rs12567114 | G             | A            | 0.036331929 | 0.006178787 | 4.10E-09 | -0.0198026  | 0.0293594 | 0.5       | -         | -                    | -                   |
|             | rs12661667 | T             | C            | 0.027615167 | 0.004972567 | 2.80E-08 | 0.0198026   | 0.0220895 | 0.37      | -         | -                    | -                   |
|             | rs12963463 | C             | T            | 0.028587457 | 0.004258199 | 1.90E-11 | 0.0100503   | 0.0221489 | 0.649999  | -         | -                    | -                   |
|             | rs13107325 | T             | C            | 0.075107472 | 0.010262117 | 2.50E-13 | -0.0304592  | 0.0431249 | 0.48      | -         | -                    | -                   |
|             | rs1380703  | G             | A            | 0.035367144 | 0.005248498 | 1.60E-11 | 0.040822    | 0.0237009 | 0.0850002 | -         | -                    | -                   |
|             | rs1607227  | G             | T            | 0.030529205 | 0.005050854 | 1.50E-09 | 0.0100503   | 0.0377392 | 0.79      | -         | -                    | -                   |
|             | rs17005118 | A             | G            | 0.030529205 | 0.005121099 | 2.50E-09 | 0.0392207   | 0.025226  | 0.12      | -         | -                    | -                   |
|             | rs17388803 | C             | A            | 0.05259245  | 0.008513132 | 6.50E-10 | 0.0100503   | 0.0377392 | 0.79      | -         | -                    | -                   |
|             | rs2014830  | C             | T            | 0.029558802 | 0.005316471 | 2.70E-08 | -0.0198026  | 0.0175806 | 0.26      | -         | -                    | -                   |
|             | rs205024   | C             | T            | 0.030529205 | 0.005491008 | 2.70E-08 | 0.0100503   | 0.0133044 | 0.450001  | -         | -                    | -                   |
|             | rs2820313  | G             | A            | 0.030529205 | 0.005109436 | 2.30E-09 | 0.0202027   | 0.0273436 | 0.46      | -         | -                    | -                   |
|             | rs2863957  | C             | A            | 0.054488185 | 0.006243162 | 2.60E-18 | 0.0202027   | 0.0211732 | 0.34      | -         | -                    | -                   |
|             | rs3776864  | A             | C            | 0.031498667 | 0.00558482  | 1.70E-08 | 0.0582689   | 0.0185677 | 0.0017    | -         | -                    | -                   |
|             | rs4585442  | G             | A            | 0.030529205 | 0.004969791 | 8.10E-10 | 0.0100503   | 0.0191654 | 0.6       | -         | -                    | -                   |
|             | rs5757675  | G             | T            | 0.034401427 | 0.005782851 | 2.70E-09 | 0.0202027   | 0.017194  | 0.24      | -         | -                    | -                   |
|             | rs59779556 | T             | G            | 0.024692613 | 0.004399966 | 2.00E-08 | 0.00995033  | 0.0151029 | 0.51      | -         | -                    | -                   |
|             | rs7524118  | C             | T            | 0.029558802 | 0.00541876  | 4.90E-08 | -0.00995033 | 0.0189747 | 0.6       | -         | -                    | -                   |
|             | rs7939345  | T             | G            | 0.035367144 | 0.006441103 | 4.00E-08 | -0.040822   | 0.024302  | 0.0929994 | -         | -                    | -                   |
|             | rs9321171  | C             | T            | 0.031498667 | 0.005745595 | 4.20E-08 | 0.0202027   | 0.0220707 | 0.36      | -         | -                    | -                   |

|                   |             |   |   |             |             |          |             |           |          |            |   |   |
|-------------------|-------------|---|---|-------------|-------------|----------|-------------|-----------|----------|------------|---|---|
| frequent insomnia | rs10156602  | A | G | 0.039220713 | 0.005635068 | 3.40E-12 | 0.00995033  | 0.0277586 | 0.719999 | -          | - | - |
|                   | rs10838708  | G | A | 0.029558802 | 0.004958319 | 2.50E-09 | -0.0198026  | 0.0203289 | 0.33     | -          | - | - |
|                   | rs11097861  | G | A | 0.039220713 | 0.00651058  | 1.70E-09 | -0.00995033 | 0.0147524 | 0.5      | -          | - | - |
|                   | rs113851554 | T | G | 0.182321557 | 0.013491706 | 1.30E-41 | 0.00995033  | 0.0437291 | 0.82     | rs11679120 | T | G |
|                   | rs11635495  | C | T | 0.039220713 | 0.006767103 | 6.80E-09 | -0.0198026  | 0.0164973 | 0.23     | -          | - | - |
|                   | rs11673344  | G | A | 0.039220713 | 0.006402123 | 9.00E-10 | 0.0202027   | 0.0194925 | 0.3      | -          | - | - |
|                   | rs11793074  | A | G | 0.039220713 | 0.007581378 | 2.30E-07 | -0.0512933  | 0.0276935 | 0.064    | -          | - | - |
|                   | rs11804386  | A | G | 0.039220713 | 0.007045927 | 2.60E-08 | -0.0100503  | 0.0359816 | 0.780001 | -          | - | - |
|                   | rs1430205   | T | C | 0.029558802 | 0.00536513  | 3.60E-08 | 0.0198026   | 0.0250923 | 0.43     | -          | - | - |
|                   | rs17139246  | C | T | 0.029558802 | 0.005387562 | 4.10E-08 | 0.0304592   | 0.0211591 | 0.15     | -          | - | - |
|                   | rs17151854  | T | G | 0.058268908 | 0.010441754 | 2.40E-08 | -0.00995033 | 0.0392755 | 0.8      | rs10087341 | T | G |
|                   | rs17669584  | G | A | 0.039220713 | 0.007118835 | 3.60E-08 | 0.0100503   | 0.0235841 | 0.67     | -          | - | - |
|                   | rs1841625   | G | A | 0.029558802 | 0.00536513  | 3.60E-08 | 0.0100503   | 0.0186519 | 0.59     | -          | - | - |
|                   | rs1942262   | A | G | 0.039220713 | 0.005279902 | 1.10E-13 | 0.0295588   | 0.0251567 | 0.24     | -          | - | - |
|                   | rs2062113   | T | C | 0.039220713 | 0.006157858 | 1.90E-10 | -0.0202027  | 0.0161162 | 0.21     | -          | - | - |
|                   | rs2296580   | G | T | 0.048790164 | 0.007147152 | 8.70E-12 | 0.0100503   | 0.0124629 | 0.42     | -          | - | - |
|                   | rs2613503   | A | C | 0.039220713 | 0.007635786 | 2.80E-07 | 0.0392207   | 0.0279137 | 0.16     | -          | - | - |
|                   | rs2956278   | G | A | 0.048790164 | 0.008580656 | 1.30E-08 | -0.00995033 | 0.0325727 | 0.760001 | rs4882414  | G | A |
|                   | rs302165    | G | A | 0.039220713 | 0.008315735 | 2.40E-06 | 0.0202027   | 0.0198998 | 0.31     | -          | - | - |
|                   | rs314280    | G | A | 0.039220713 | 0.006250475 | 3.50E-10 | -0.0198026  | 0.0161453 | 0.22     | -          | - | - |
|                   | rs324017    | A | C | 0.048790164 | 0.007561404 | 1.10E-10 | 0.0198026   | 0.028037  | 0.48     | -          | - | - |
|                   | rs3824081   | T | C | 0.039220713 | 0.006863317 | 1.10E-08 | -0.0100503  | 0.0164003 | 0.54     | -          | - | - |
|                   | rs4577309   | A | G | 0.029558802 | 0.005012451 | 3.70E-09 | -0.0304592  | 0.020117  | 0.13     | -          | - | - |
|                   | rs4688760   | T | C | 0.048790164 | 0.006842454 | 1.00E-12 | -0.0100503  | 0.0124629 | 0.42     | -          | - | - |
|                   | rs4751      | T | G | 0.029558802 | 0.005231202 | 1.60E-08 | 0.0676586   | 0.0386469 | 0.08     | -          | - | - |

|              |             |   |   |             |             |          |             |           |          |            |   |   |
|--------------|-------------|---|---|-------------|-------------|----------|-------------|-----------|----------|------------|---|---|
|              | rs62158170  | A | G | 0.048790164 | 0.006769386 | 5.70E-13 | 0.0295588   | 0.0220464 | 0.18     | -          | - | - |
|              | rs6593005   | G | A | 0.029558802 | 0.005135074 | 8.60E-09 | -0.00995033 | 0.0158443 | 0.53     | -          | - | - |
|              | rs6664467   | G | A | 0.048790164 | 0.008919568 | 4.50E-08 | -0.00995033 | 0.0175166 | 0.57     | -          | - | - |
|              | rs6785034   | A | G | 0.029558802 | 0.007578237 | 9.60E-05 | -0.0100503  | 0.0302855 | 0.74     | rs7638072  | A | G |
|              | rs68094047  | T | C | 0.039220713 | 0.006629675 | 3.30E-09 | -0.0100503  | 0.0280376 | 0.719999 | rs35393419 | T | C |
|              | rs7711696   | T | G | 0.048790164 | 0.007166647 | 9.90E-12 | 0.00995033  | 0.0233495 | 0.67     | -          | - | - |
|              | rs9845387   | C | A | 0.09531018  | 0.017008879 | 2.10E-08 | 0.0202027   | 0.0524309 | 0.7      | -          | - | - |
| any insomnia | rs10156602  | A | G | 0.029558802 | 0.005186004 | 1.20E-08 | 0.00995033  | 0.0277586 | 0.719999 | -          | - | - |
|              | rs10838708  | G | A | 0.019802627 | 0.004558762 | 1.40E-05 | -0.0198026  | 0.0203289 | 0.33     | -          | - | - |
|              | rs11097861  | G | A | 0.029558802 | 0.005023425 | 4.00E-09 | -0.00995033 | 0.0147524 | 0.5      | -          | - | - |
|              | rs113851554 | T | G | 0.131028262 | 0.011853626 | 2.10E-28 | 0.00995033  | 0.0437291 | 0.82     | rs11679120 | T | G |
|              | rs11635495  | C | T | 0.019802627 | 0.004274041 | 3.60E-06 | -0.0198026  | 0.0164973 | 0.23     | -          | - | - |
|              | rs11673344  | G | A | 0.029558802 | 0.00548541  | 7.10E-08 | 0.0202027   | 0.0194925 | 0.3      | -          | - | - |
|              | rs11793074  | A | G | 0.039220713 | 0.006799167 | 8.00E-09 | -0.0512933  | 0.0276935 | 0.064    | -          | - | - |
|              | rs11804386  | A | G | 0.029558802 | 0.005104332 | 7.00E-09 | -0.0100503  | 0.0359816 | 0.780001 | -          | - | - |
|              | rs1430205   | T | C | 0.029558802 | 0.005497905 | 7.60E-08 | 0.0198026   | 0.0250923 | 0.43     | -          | - | - |
|              | rs17139246  | C | T | 0.019802627 | 0.004541778 | 1.30E-05 | 0.0304592   | 0.0211591 | 0.15     | -          | - | - |
|              | rs17151854  | T | G | 0.029558802 | 0.007493865 | 8.00E-05 | -0.00995033 | 0.0392755 | 0.8      | rs10087341 | T | G |
|              | rs17669584  | G | A | 0.039220713 | 0.007194731 | 5.00E-08 | 0.0100503   | 0.0235841 | 0.67     | -          | - | - |
|              | rs1841625   | G | A | 0.019802627 | 0.004483099 | 1.00E-05 | 0.0100503   | 0.0186519 | 0.59     | -          | - | - |
|              | rs1942262   | A | G | 0.029558802 | 0.00445046  | 3.10E-11 | 0.0295588   | 0.0251567 | 0.24     | -          | - | - |
|              | rs2296580   | G | T | 0.039220713 | 0.007009344 | 2.20E-08 | 0.0100503   | 0.0124629 | 0.42     | -          | - | - |
|              | rs2613503   | A | C | 0.029558802 | 0.00541876  | 4.90E-08 | 0.0392207   | 0.0279137 | 0.16     | -          | - | - |
|              | rs28061     | A | G | 0.029558802 | 0.005796063 | 3.40E-07 | 0.0676586   | 0.0175914 | 0.00012  | -          | - | - |
|              | rs2956278   | G | A | 0.029558802 | 0.005731003 | 2.50E-07 | -0.00995033 | 0.0325727 | 0.760001 | rs4882414  | G | A |



|                |             |   |   |             |             |          |             |           |             |            |   |   |
|----------------|-------------|---|---|-------------|-------------|----------|-------------|-----------|-------------|------------|---|---|
|                | rs302165    | G | A | 0.029558802 | 0.005350275 | 3.30E-08 | 0.0202027   | 0.0198998 | 0.31        | -          | - | - |
|                | rs3104778   | A | G | 0.019802627 | 0.003839429 | 2.50E-07 | 0.0198026   | 0.0147698 | 0.18        | -          | - | - |
|                | rs324017    | A | C | 0.029558802 | 0.005282612 | 2.20E-08 | 0.0198026   | 0.028037  | 0.48        | -          | - | - |
|                | rs3824081   | T | C | 0.039220713 | 0.006198959 | 2.50E-10 | -0.0100503  | 0.0164003 | 0.54        | -          | - | - |
|                | rs4577309   | A | G | 0.029558802 | 0.005275009 | 2.10E-08 | -0.0304592  | 0.020117  | 0.13        | -          | - | - |
|                | rs4688760   | T | C | 0.039220713 | 0.005724268 | 7.30E-12 | -0.0100503  | 0.0124629 | 0.42        | -          | - | - |
|                | rs4751      | T | G | 0.019802627 | 0.00494907  | 6.30E-05 | 0.0676586   | 0.0386469 | 0.08        | -          | - | - |
|                | rs62158170  | A | G | 0.048790164 | 0.005897107 | 1.30E-16 | 0.0295588   | 0.0220464 | 0.18        | -          | - | - |
|                | rs6593005   | G | A | 0.019802627 | 0.00409166  | 1.30E-06 | -0.00995033 | 0.0158443 | 0.53        | -          | - | - |
|                | rs6664467   | G | A | 0.029558802 | 0.006603617 | 7.60E-06 | -0.00995033 | 0.0175166 | 0.57        | -          | - | - |
|                | rs6785034   | A | G | 0.029558802 | 0.005355358 | 3.40E-08 | -0.0100503  | 0.0302855 | 0.74        | rs7638072  | A | G |
|                | rs68094047  | T | C | 0.029558802 | 0.005704579 | 2.20E-07 | -0.0100503  | 0.0280376 | 0.719999    | rs35393419 | T | C |
|                | rs6932158   | C | T | 0.029558802 | 0.006779378 | 1.30E-05 | -0.0392207  | 0.0179624 | 0.0290001   | -          | - | - |
|                | rs7711696   | T | G | 0.029558802 | 0.005776291 | 3.10E-07 | 0.00995033  | 0.0233495 | 0.67        | -          | - | - |
|                | rs9845387   | C | A | 0.067658648 | 0.01383149  | 1.00E-06 | 0.0202027   | 0.0524309 | 0.7         | -          | - | - |
| sleep duration | rs10973207  | T | G | 0.02        | 0.003391    | 2.02E-06 | 0.0100503   | 0.0359816 | 0.780001    | rs10814514 | T | G |
|                | rs11076146  | G | T | 0.01        | 0.002461    | 2.96E-06 | -0.00995033 | 0.0162371 | 0.54        | -          | - | - |
|                | rs11621908  | T | C | -0.03       | 0.004548    | 4.95E-06 | 0.0392207   | 0.040263  | 0.33        | -          | - | - |
|                | rs11650677  | A | G | 0.01        | 0.00258     | 8.95E-09 | -0.0100503  | 0.0235841 | 0.67        | -          | - | - |
|                | rs12215241  | A | G | -0.02       | 0.002931    | 6.09E-10 | 0.0861777   | 0.0241543 | 0.000359998 | -          | - | - |
|                | rs12607679  | C | T | -0.02       | 0.002821    | 9.79E-08 | 0.0202027   | 0.0164715 | 0.22        | -          | - | - |
|                | rs1263056   | G | A | -0.01       | 0.002471    | 4.15E-05 | 0.0100503   | 0.0168133 | 0.55        | -          | - | - |
|                | rs13109404  | G | T | -0.03       | 0.004795    | 1.13E-08 | -0.076961   | 0.0382113 | 0.0439997   | -          | - | - |
|                | rs13329140  | A | G | -0.02       | 0.002888    | 7.51E-08 | -0.0202027  | 0.0273436 | 0.46        | -          | - | - |
|                | rs144625846 | G | A | -0.02       | 0.003575    | 1.05E-05 | -0.0202027  | 0.024521  | 0.41        | rs11191275 | G | A |

|            |             |   |   |       |          |          |             |           |           |            |   |   |
|------------|-------------|---|---|-------|----------|----------|-------------|-----------|-----------|------------|---|---|
|            | rs1553132   | G | A | 0.02  | 0.002788 | 6.63E-06 | -0.0295588  | 0.0240996 | 0.22      | -          | - | - |
|            | rs16834426  | A | G | 0.02  | 0.002763 | 1.76E-05 | -0.0100503  | 0.015622  | 0.52      | -          | - | - |
|            | rs2192528   | A | G | 0.02  | 0.002452 | 6.27E-07 | 0.0198026   | 0.0250923 | 0.43      | -          | - | - |
|            | rs28651105  | G | A | 0.02  | 0.002969 | 4.75E-05 | 0.0100503   | 0.0243666 | 0.68      | -          | - | - |
|            | rs365663    | G | A | -0.02 | 0.002462 | 1.12E-08 | 0.0100503   | 0.0302855 | 0.74      | -          | - | - |
|            | rs3823624   | C | T | 0.02  | 0.003188 | 1.30E-06 | -0.0392207  | 0.0259036 | 0.13      | -          | - | - |
|            | rs41501452  | G | A | -0.02 | 0.002633 | 4.04E-06 | 0.0304592   | 0.021678  | 0.16      | -          | - | - |
|            | rs4688116   | G | T | -0.01 | 0.002508 | 4.20E-05 | -0.0198026  | 0.0164973 | 0.23      | -          | - | - |
|            | rs4767550   | G | A | 0.01  | 0.002507 | 2.70E-06 | 0.0100503   | 0.0107537 | 0.35      | -          | - | - |
|            | rs540431    | G | A | -0.01 | 0.002465 | 4.91E-06 | -0.00995033 | 0.0258235 | 0.7       | rs269045   | G | A |
|            | rs62158206  | C | T | 0.04  | 0.002968 | 3.00E-40 | -0.0198026  | 0.0203289 | 0.33      | -          | - | - |
|            | rs651902    | C | T | 0.01  | 0.002534 | 3.35E-09 | -0.00995033 | 0.0212751 | 0.64      | -          | - | - |
|            | rs6889592   | A | G | 0.02  | 0.002596 | 1.44E-08 | -0.0512933  | 0.016157  | 0.0015    | -          | - | - |
|            | rs7115856   | C | A | 0.01  | 0.002452 | 1.25E-06 | 0.040822    | 0.0198768 | 0.04      | -          | - | - |
|            | rs7686205   | G | A | 0.01  | 0.002519 | 1.37E-05 | -0.0100503  | 0.0359816 | 0.780001  | rs62304946 | G | A |
|            | rs7915425   | T | C | 0.02  | 0.003221 | 3.08E-07 | 0.0198026   | 0.0245562 | 0.42      | -          | - | - |
|            | rs8047587   | T | G | -0.02 | 0.002468 | 1.09E-09 | -0.0100503  | 0.0243666 | 0.68      | rs11642015 | T | G |
|            | rs9362971   | C | T | -0.01 | 0.002567 | 1.41E-05 | 0.0100503   | 0.0228462 | 0.66      | -          | - | - |
|            | rs9451146   | T | C | -0.02 | 0.002915 | 8.53E-06 | 0.00995033  | 0.0437291 | 0.82      | rs4706335  | T | C |
|            | rs9843801   | C | T | 0.02  | 0.002584 | 5.82E-10 | 0.0100503   | 0.025198  | 0.69      | -          | - | - |
| getting up | rs10175975  | T | C | 0.01  | 0.0023   | 3.30E-06 | -0.0304592  | 0.0293885 | 0.3       | -          | - | - |
|            | rs10470887  | G | A | -0.01 | 0.0017   | 4.05E-05 | -0.0198026  | 0.0175806 | 0.26      | -          | - | - |
|            | rs11229264  | A | G | -0.01 | 0.0019   | 1.43E-07 | -0.040822   | 0.021186  | 0.0539995 | -          | - | - |
|            | rs113240734 | A | G | 0.02  | 0.0023   | 2.17E-13 | -0.0198026  | 0.019913  | 0.32      | rs7547493  | A | G |
|            | rs11642015  | T | C | 0.01  | 0.0018   | 6.20E-08 | -0.0100503  | 0.0243666 | 0.68      | -          | - | - |

|  |            |   |   |       |        |          |             |           |            |            |   |   |
|--|------------|---|---|-------|--------|----------|-------------|-----------|------------|------------|---|---|
|  | rs11643192 | A | C | -0.01 | 0.0018 | 1.30E-06 | -0.0100503  | 0.0181616 | 0.58       | -          | - | - |
|  | rs11697690 | C | T | 0.01  | 0.0017 | 2.33E-05 | -0.0198026  | 0.0179524 | 0.27       | -          | - | - |
|  | rs12150229 | G | A | 0.01  | 0.0021 | 3.52E-06 | -0.00995033 | 0.0179809 | 0.58       | -          | - | - |
|  | rs12515274 | A | G | -0.01 | 0.002  | 5.37E-07 | 0.0198026   | 0.0274093 | 0.47       | -          | - | - |
|  | rs12601968 | T | G | -0.01 | 0.0018 | 1.16E-06 | 0.00995033  | 0.016646  | 0.55       | -          | - | - |
|  | rs12736689 | C | T | 0.05  | 0.0051 | 1.66E-21 | 0.0202027   | 0.0396074 | 0.61       | -          | - | - |
|  | rs12752290 | C | T | 0.01  | 0.0017 | 1.02E-09 | -0.0295588  | 0.0184951 | 0.11       | -          | - | - |
|  | rs13116306 | T | C | -0.01 | 0.0018 | 1.76E-05 | 0.0676586   | 0.0210383 | 0.00129999 | -          | - | - |
|  | rs1420607  | A | G | 0.01  | 0.0019 | 1.57E-08 | 0.00995033  | 0.0241242 | 0.68       | -          | - | - |
|  | rs1459192  | T | C | -0.01 | 0.0018 | 2.50E-05 | 0.0198026   | 0.0225569 | 0.38       | -          | - | - |
|  | rs1606803  | T | C | 0.01  | 0.0019 | 3.22E-07 | -0.0100503  | 0.0172437 | 0.56       | -          | - | - |
|  | rs16917522 | C | T | 0.01  | 0.0022 | 1.12E-06 | -0.0295588  | 0.0291156 | 0.31       | -          | - | - |
|  | rs17822102 | G | A | 0.01  | 0.0018 | 9.40E-07 | 0.0100503   | 0.0145592 | 0.49       | -          | - | - |
|  | rs2053457  | C | T | -0.02 | 0.002  | 1.29E-12 | 0.0100503   | 0.0441686 | 0.82       | -          | - | - |
|  | rs2193749  | T | C | -0.01 | 0.0017 | 1.84E-05 | -0.0512933  | 0.0185539 | 0.00569994 | -          | - | - |
|  | rs2653349  | A | G | 0.02  | 0.0021 | 8.45E-26 | 0.00995033  | 0.0170721 | 0.56       | -          | - | - |
|  | rs2944822  | T | C | 0.01  | 0.0017 | 4.43E-06 | -0.0100503  | 0.0291208 | 0.73       | rs2968500  | T | C |
|  | rs301806   | C | T | -0.01 | 0.0017 | 4.73E-05 | -0.0295588  | 0.0176506 | 0.0940005  | -          | - | - |
|  | rs3735478  | T | G | -0.01 | 0.0019 | 1.57E-05 | -0.0202027  | 0.0194925 | 0.3        | -          | - | - |
|  | rs3760185  | T | C | -0.01 | 0.002  | 4.52E-05 | -0.0100503  | 0.0396702 | 0.8        | -          | - | - |
|  | rs406952   | C | T | 0.01  | 0.0018 | 1.20E-05 | -0.00995033 | 0.0162371 | 0.54       | -          | - | - |
|  | rs4671328  | T | G | 0.01  | 0.0018 | 1.06E-06 | -0.0100503  | 0.0145592 | 0.49       | -          | - | - |
|  | rs4790352  | G | A | -0.02 | 0.0031 | 8.78E-06 | 0.0202027   | 0.0459243 | 0.66       | -          | - | - |
|  | rs4853283  | G | A | -0.01 | 0.0017 | 1.84E-13 | 0.00995033  | 0.0356235 | 0.780001   | rs11896560 | G | A |
|  | rs4884166  | A | G | -0.01 | 0.0022 | 1.15E-05 | -0.0202027  | 0.0207396 | 0.33       | -          | - | - |

|          |             |   |   |        |        |          |            |            |            |            |   |   |
|----------|-------------|---|---|--------|--------|----------|------------|------------|------------|------------|---|---|
|          | rs4958316   | A | C | 0.02   | 0.0019 | 3.69E-12 | -0.0100503 | 0.0228462  | 0.66       | -          | - | - |
|          | rs4962716   | T | C | -0.02  | 0.0026 | 1.82E-06 | -0.0100503 | 0.0302855  | 0.74       | -          | - | - |
|          | rs553108    | A | G | 0.01   | 0.0018 | 3.12E-05 | -0.301105  | 0.0167993  | 7.70E-72   | -          | - | - |
|          | rs61773374  | G | A | 0.02   | 0.0022 | 3.37E-14 | 0.0512933  | 0.0180559  | 0.00449997 | -          | - | - |
|          | rs6575012   | A | G | -0.01  | 0.0017 | 2.57E-05 | -0.0304592 | 0.0190585  | 0.11       | -          | - | - |
|          | rs6581138   | A | G | 0.01   | 0.002  | 2.30E-07 | -0.040822  | 0.0180858  | 0.0239999  | -          | - | - |
|          | rs7297799   | T | C | -0.01  | 0.0018 | 1.21E-09 | 0.00995033 | 0.0175166  | 0.57       | -          | - | - |
|          | rs7332608   | G | A | -0.03  | 0.0048 | 4.55E-08 | -0.0487902 | 0.0555762  | 0.38       | -          | - | - |
|          | rs76048411  | T | C | 0.01   | 0.0017 | 8.53E-07 | 0.0198026  | 0.0256447  | 0.44       | rs72631529 | T | C |
|          | rs77576965  | T | C | 0.01   | 0.0019 | 1.94E-05 | 0.0202027  | 0.0203153  | 0.32       | rs16851819 | T | C |
|          | rs8182491   | T | C | -0.02  | 0.0029 | 1.18E-06 | 0.0676586  | 0.0337508  | 0.0449997  | -          | - | - |
|          | rs9399613   | T | C | -0.01  | 0.0019 | 1.32E-05 | -0.0100503 | 0.0396702  | 0.8        | rs9390489  | T | C |
|          | rs9995419   | A | G | 0.01   | 0.002  | 1.50E-05 | -0.0100503 | 0.0168133  | 0.55       | -          | - | - |
| mornings | rs10190053  | A | C | -0.013 | 0.002  | 6.51E-06 | 0.0392207  | 0.0392207  | 0.11       | -          | - | - |
|          | rs10262462  | A | G | -0.015 | 0.002  | 3.18E-09 | -0.0304592 | -0.0304592 | 0.1        | -          | - | - |
|          | rs10758971  | T | C | 0.012  | 0.002  | 9.87E-10 | -0.0304592 | -0.0304592 | 0.13       | -          | - | - |
|          | rs10797119  | T | C | -0.013 | 0.002  | 2.80E-06 | -0.0202027 | -0.0202027 | 0.35       | -          | - | - |
|          | rs10818834  | T | C | 0.014  | 0.002  | 5.24E-06 | -0.0100503 | -0.0100503 | 0.64       | -          | - | - |
|          | rs10861694  | T | C | 0.014  | 0.002  | 2.60E-07 | 0.0295588  | 0.0295588  | 0.19       | -          | - | - |
|          | rs11032362  | A | G | 0.031  | 0.004  | 3.46E-14 | -0.0202027 | -0.0202027 | 0.37       | -          | - | - |
|          | rs11039308  | A | G | 0.014  | 0.002  | 1.28E-12 | 0.0295588  | 0.0295588  | 0.2        | -          | - | - |
|          | rs1109088   | A | G | 0.013  | 0.002  | 2.60E-06 | 0.0198026  | 0.0198026  | 0.47       | -          | - | - |
|          | rs1110698   | A | C | -0.022 | 0.004  | 2.89E-05 | -0.0833816 | -0.0833816 | 0.0290001  | -          | - | - |
|          | rs112613078 | A | G | -0.025 | 0.003  | 1.55E-17 | 0.0676586  | 0.0676586  | 0.0140001  | rs56186316 | G | A |
|          | rs11611435  | T | C | 0.012  | 0.002  | 4.00E-05 | -0.0100503 | -0.0100503 | 0.66       | -          | - | - |

|  |            |   |   |        |       |          |            |            |           |            |   |   |
|--|------------|---|---|--------|-------|----------|------------|------------|-----------|------------|---|---|
|  | rs11988076 | A | G | -0.019 | 0.003 | 1.82E-08 | 0.0392207  | 0.0392207  | 0.18      | -          | - | - |
|  | rs12025393 | A | G | -0.014 | 0.002 | 1.82E-05 | 0.0198026  | 0.0198026  | 0.47      | -          | - | - |
|  | rs12139650 | T | G | 0.015  | 0.003 | 2.21E-05 | 0.00995033 | 0.00995033 | 0.760001  | rs11165789 | G | T |
|  | rs12140153 | T | G | -0.027 | 0.004 | 4.62E-09 | 0.00995033 | 0.00995033 | 0.75      | -          | - | - |
|  | rs12432176 | A | C | 0.013  | 0.002 | 4.02E-11 | -0.0202027 | -0.0202027 | 0.4       | -          | - | - |
|  | rs12927162 | A | G | 0.028  | 0.002 | 2.11E-29 | -0.0100503 | -0.0100503 | 0.68      | -          | - | - |
|  | rs12969848 | T | C | 0.017  | 0.002 | 1.52E-12 | 0.0295588  | 0.0295588  | 0.19      | -          | - | - |
|  | rs13004345 | T | C | -0.012 | 0.002 | 3.76E-05 | -0.0202027 | -0.0202027 | 0.34      | -          | - | - |
|  | rs13306728 | A | G | 0.03   | 0.004 | 6.16E-11 | 0.0295588  | 0.0295588  | 0.4       | -          | - | - |
|  | rs1421085  | T | C | -0.023 | 0.002 | 1.39E-22 | 0.00995033 | 0.00995033 | 0.67      | -          | - | - |
|  | rs17416934 | T | C | 0.013  | 0.002 | 4.02E-11 | -0.0304592 | -0.0304592 | 0.2       | -          | - | - |
|  | rs17448682 | T | C | 0.018  | 0.003 | 4.04E-10 | 0.0392207  | 0.0392207  | 0.0700003 | -          | - | - |
|  | rs1750785  | A | G | 0.014  | 0.002 | 3.52E-06 | -0.0100503 | -0.0100503 | 0.56      | -          | - | - |
|  | rs17596722 | T | C | -0.018 | 0.003 | 3.24E-08 | 0.00995033 | 0.00995033 | 0.69      | -          | - | - |
|  | rs17604349 | A | G | -0.022 | 0.003 | 1.21E-12 | 0.00995033 | 0.00995033 | 0.75      | -          | - | - |
|  | rs1919346  | A | G | 0.012  | 0.002 | 1.30E-05 | -0.0100503 | -0.0100503 | 0.79      | rs6468317  | G | A |
|  | rs2072727  | T | C | 0.012  | 0.002 | 3.46E-05 | -0.0202027 | -0.0202027 | 0.2       | -          | - | - |
|  | rs2138759  | A | G | 0.014  | 0.002 | 1.75E-06 | -0.0100503 | -0.0100503 | 0.630001  | -          | - | - |
|  | rs225289   | T | C | 0.016  | 0.003 | 1.24E-05 | 0.00995033 | 0.00995033 | 0.6       | -          | - | - |
|  | rs2291589  | T | G | 0.018  | 0.002 | 1.65E-13 | 0.0295588  | 0.0295588  | 0.0920005 | -          | - | - |
|  | rs2294203  | A | G | 0.013  | 0.002 | 2.97E-05 | 0.0198026  | 0.0198026  | 0.22      | -          | - | - |
|  | rs2518022  | T | C | 0.032  | 0.004 | 1.53E-13 | 0.0392207  | 0.0392207  | 0.24      | -          | - | - |
|  | rs2653349  | A | G | 0.031  | 0.003 | 1.03E-29 | 0.00995033 | 0.00995033 | 0.56      | -          | - | - |
|  | rs2699869  | A | C | 0.013  | 0.002 | 5.06E-06 | 0.0198026  | 0.0198026  | 0.34      | -          | - | - |
|  | rs2701524  | T | C | 0.013  | 0.002 | 5.39E-06 | -0.0100503 | -0.0100503 | 0.67      | -          | - | - |

|  |            |   |   |        |       |          |            |            |             |           |   |   |
|--|------------|---|---|--------|-------|----------|------------|------------|-------------|-----------|---|---|
|  | rs2706762  | T | C | -0.019 | 0.003 | 3.01E-07 | -0.0618754 | -0.0618754 | 0.0329997   | -         | - | - |
|  | rs2712056  | T | C | 0.018  | 0.003 | 1.57E-07 | -0.0202027 | -0.0202027 | 0.31        | -         | - | - |
|  | rs2737245  | T | G | 0.018  | 0.002 | 2.94E-11 | -0.0100503 | -0.0100503 | 0.81        | rs4876611 | T | G |
|  | rs2794682  | T | C | 0.021  | 0.002 | 3.93E-19 | -0.0202027 | -0.0202027 | 0.41        | -         | - | - |
|  | rs28634184 | T | C | -0.014 | 0.002 | 2.31E-05 | 0.0198026  | 0.0198026  | 0.41        | -         | - | - |
|  | rs286808   | T | C | 0.013  | 0.002 | 3.87E-06 | 0.0295588  | 0.0295588  | 0.14        | -         | - | - |
|  | rs2881955  | T | C | 0.016  | 0.002 | 5.64E-08 | 0.0198026  | 0.0198026  | 0.32        | -         | - | - |
|  | rs2910032  | T | C | 0.019  | 0.002 | 6.18E-15 | 0.00995033 | 0.00995033 | 0.61        | -         | - | - |
|  | rs2916142  | T | C | 0.015  | 0.002 | 7.63E-09 | -0.0100503 | -0.0100503 | 0.48        | -         | - | - |
|  | rs2971970  | T | G | 0.017  | 0.003 | 7.28E-09 | 0.0198026  | 0.0198026  | 0.3         | -         | - | - |
|  | rs3100052  | A | G | 0.013  | 0.002 | 1.30E-05 | -0.0304592 | -0.0304592 | 0.11        | -         | - | - |
|  | rs3168135  | A | G | -0.017 | 0.003 | 3.64E-09 | -0.0100503 | -0.0100503 | 0.56        | -         | - | - |
|  | rs335433   | T | C | -0.013 | 0.002 | 2.29E-06 | -0.0202027 | -0.0202027 | 0.23        | -         | - | - |
|  | rs35461065 | T | C | -0.012 | 0.002 | 8.36E-06 | 0.0295588  | 0.0295588  | 0.15        | -         | - | - |
|  | rs35748596 | T | G | -0.016 | 0.002 | 2.37E-09 | -0.0100503 | -0.0100503 | 0.719999    | rs4266671 | G | T |
|  | rs3797051  | T | C | 0.015  | 0.003 | 1.48E-06 | -0.0100503 | -0.0100503 | 0.58        | -         | - | - |
|  | rs3843751  | T | C | 0.013  | 0.002 | 6.33E-06 | -0.0618754 | -0.0618754 | 0.000340001 | -         | - | - |
|  | rs4102203  | T | C | 0.024  | 0.003 | 7.80E-09 | 0.0861777  | 0.0861777  | 0.00420001  | -         | - | - |
|  | rs4237555  | T | C | 0.012  | 0.002 | 4.19E-05 | -0.0304592 | -0.0304592 | 0.15        | -         | - | - |
|  | rs4241964  | T | G | -0.015 | 0.002 | 3.54E-09 | 0.0392207  | 0.0392207  | 0.0719996   | -         | - | - |
|  | rs4245555  | T | C | -0.018 | 0.002 | 1.96E-12 | 0.0198026  | 0.0198026  | 0.22        | -         | - | - |
|  | rs4557564  | A | G | 0.025  | 0.004 | 2.15E-06 | 0.0198026  | 0.0198026  | 0.67        | -         | - | - |
|  | rs4672440  | T | G | 0.016  | 0.002 | 5.09E-10 | 0.0100503  | 0.0100503  | 0.75        | rs778138  | T | G |
|  | rs486416   | A | G | -0.013 | 0.002 | 6.07E-06 | 0.270027   | 0.270027   | 3.30E-55    | -         | - | - |
|  | rs487952   | A | G | 0.013  | 0.002 | 4.43E-06 | 0.00995033 | 0.00995033 | 0.46        | -         | - | - |

|  |            |   |   |        |       |          |             |             |             |            |   |   |
|--|------------|---|---|--------|-------|----------|-------------|-------------|-------------|------------|---|---|
|  | rs4899502  | A | G | -0.016 | 0.002 | 1.61E-08 | 0.00995033  | 0.00995033  | 0.51        | -          | - | - |
|  | rs509476   | T | C | 0.099  | 0.006 | 7.41E-53 | 0.0295588   | 0.0295588   | 0.49        | -          | - | - |
|  | rs56040212 | A | G | -0.014 | 0.003 | 2.20E-05 | 0.0198026   | 0.0198026   | 0.31        | -          | - | - |
|  | rs56049037 | A | G | -0.017 | 0.002 | 2.28E-09 | 0.0295588   | 0.0295588   | 0.26        | -          | - | - |
|  | rs56376592 | A | C | 0.017  | 0.003 | 1.40E-06 | 0.0295588   | 0.0295588   | 0.2         | -          | - | - |
|  | rs56382918 | T | C | 0.018  | 0.002 | 1.13E-09 | 0.0100503   | 0.0100503   | 0.7         | rs62448710 | C | T |
|  | rs57180764 | A | G | 0.017  | 0.003 | 3.22E-08 | 0.0198026   | 0.0198026   | 0.48        | -          | - | - |
|  | rs605765   | T | C | -0.012 | 0.002 | 3.13E-05 | -0.0304592  | -0.0304592  | 0.19        | -          | - | - |
|  | rs61773390 | T | G | 0.029  | 0.003 | 2.75E-24 | 0.0582689   | 0.0582689   | 0.005       | -          | - | - |
|  | rs61963123 | T | C | 0.017  | 0.003 | 2.33E-07 | -0.0304592  | -0.0304592  | 0.2         | -          | - | - |
|  | rs62172117 | A | G | -0.019 | 0.002 | 1.43E-14 | -0.0100503  | -0.0100503  | 0.6         | -          | - | - |
|  | rs62182135 | A | C | -0.013 | 0.002 | 7.80E-06 | 0.0100503   | 0.0100503   | 0.75        | rs55962118 | A | C |
|  | rs62263597 | A | G | 0.028  | 0.004 | 4.79E-10 | -0.0202027  | -0.0202027  | 0.5         | -          | - | - |
|  | rs6472936  | T | C | 0.018  | 0.003 | 5.16E-09 | 0.00995033  | 0.00995033  | 0.780001    | -          | - | - |
|  | rs6504758  | A | G | -0.014 | 0.002 | 9.83E-08 | -0.00995033 | -0.00995033 | 0.69        | rs2202237  | A | G |
|  | rs671255   | A | G | -0.014 | 0.002 | 1.42E-05 | 0.0295588   | 0.0295588   | 0.13        | -          | - | - |
|  | rs6716898  | A | G | 0.021  | 0.002 | 2.32E-19 | 0.0676586   | 0.0676586   | 0.000560003 | -          | - | - |
|  | rs6769642  | A | C | 0.016  | 0.002 | 2.80E-10 | -0.0100503  | -0.0100503  | 0.39        | -          | - | - |
|  | rs6778003  | T | G | 0.016  | 0.002 | 4.94E-09 | 0.00995033  | 0.00995033  | 0.81        | -          | - | - |
|  | rs6799356  | A | C | 0.014  | 0.003 | 1.53E-06 | 0.0198026   | 0.0198026   | 0.54        | -          | - | - |
|  | rs6935086  | T | C | 0.02   | 0.003 | 1.31E-11 | 0.122218    | 0.122218    | 0.02        | -          | - | - |
|  | rs695459   | T | C | -0.013 | 0.002 | 6.59E-06 | -0.0100503  | -0.0100503  | 0.79        | -          | - | - |
|  | rs7138306  | A | G | 0.013  | 0.002 | 4.02E-11 | 0.0198026   | 0.0198026   | 0.36        | -          | - | - |
|  | rs7196720  | T | C | 0.013  | 0.002 | 4.32E-06 | -0.0100503  | -0.0100503  | 0.46        | -          | - | - |
|  | rs72720396 | A | G | -0.022 | 0.003 | 3.29E-15 | -0.0304592  | -0.0304592  | 0.14        | -          | - | - |

|         |            |   |   |              |          |          |             |             |           |            |   |   |
|---------|------------|---|---|--------------|----------|----------|-------------|-------------|-----------|------------|---|---|
|         | rs7313852  | A | G | -0.025       | 0.002    | 1.02E-26 | -0.0202027  | -0.0202027  | 0.35      | -          | - | - |
|         | rs7337911  | A | G | 0.015        | 0.002    | 1.00E-06 | 0.00995033  | 0.00995033  | 0.59      | -          | - | - |
|         | rs7428484  | A | G | 0.013        | 0.002    | 1.97E-05 | -0.0100503  | -0.0100503  | 0.57      | -          | - | - |
|         | rs7488974  | A | G | 0.016        | 0.002    | 1.81E-10 | 0.0100503   | 0.0100503   | 0.8       | rs7959983  | A | G |
|         | rs7579662  | A | G | -0.012       | 0.002    | 2.24E-05 | -0.0304592  | -0.0304592  | 0.18      | -          | - | - |
|         | rs76518095 | T | C | 0.023        | 0.004    | 1.00E-05 | -0.00995033 | -0.00995033 | 0.79      | rs7086182  | T | C |
|         | rs77598468 | A | C | -0.042       | 0.006    | 1.05E-09 | 0.040822    | 0.040822    | 0.43      | rs62550819 | A | C |
|         | rs78095690 | T | C | -0.013       | 0.002    | 5.75E-06 | 0.0202027   | 0.0202027   | 0.28      | rs6043841  | C | T |
|         | rs827751   | A | G | 0.019        | 0.002    | 1.05E-21 | -0.0512933  | -0.0512933  | 0.0219999 | -          | - | - |
|         | rs925947   | T | G | 0.016        | 0.003    | 9.64E-07 | 0.0198026   | 0.0198026   | 0.47      | rs6265     | T | G |
|         | rs9295795  | T | C | -0.026       | 0.005    | 1.90E-05 | 0.19062     | 0.19062     | 4.70E-08  | -          | - | - |
|         | rs9348050  | T | C | 0.013        | 0.002    | 2.00E-06 | -0.0100503  | -0.0100503  | 0.59      | -          | - | - |
|         | rs9395520  | T | C | 0.02         | 0.002    | 1.60E-15 | -0.0100503  | -0.0100503  | 0.51      | -          | - | - |
|         | rs9416744  | A | C | 0.017        | 0.002    | 1.47E-09 | 0.0198026   | 0.0198026   | 0.33      | -          | - | - |
|         | rs9521184  | T | C | 0.013        | 0.002    | 8.34E-07 | 0.00995033  | 0.00995033  | 0.62      | -          | - | - |
|         | rs9565309  | T | C | 0.066        | 0.006    | 1.26E-25 | 0.0487902   | 0.0487902   | 0.38      | -          | - | - |
|         | rs9597250  | A | C | -0.019       | 0.003    | 2.88E-09 | -0.0304592  | -0.0304592  | 0.16      | -          | - | - |
|         | rs9636202  | A | G | -0.013       | 0.002    | 3.53E-05 | -0.0304592  | -0.0304592  | 0.0959997 | -          | - | - |
|         | rs974552   | A | G | -0.022       | 0.003    | 1.40E-12 | -0.00995033 | -0.00995033 | 0.760001  | rs6506291  | G | A |
|         | rs9795439  | A | G | 0.018        | 0.003    | 9.87E-10 | -0.0202027  | -0.0202027  | 0.47      | -          | - | - |
|         | rs9898091  | T | C | 0.038        | 0.006    | 6.88E-09 | 0.113329    | 0.113329    | 0.0870001 | -          | - | - |
|         | rs9964420  | A | C | -0.022       | 0.002    | 4.03E-18 | 0.0198026   | 0.0198026   | 0.38      | -          | - | - |
| snoring | rs10062026 | A | G | -0.030459207 | 0.005204 | 2.08E-08 | 0.0487902   | 0.0194217   | 0.012     | -          | - | - |
|         | rs1016013  | A | G | -0.030459207 | 0.005145 | 7.22E-10 | -0.0202027  | 0.0207396   | 0.33      | -          | - | - |
|         | rs10878269 | T | C | 0.039220713  | 0.005176 | 3.76E-13 | 0.00995033  | 0.0226189   | 0.66      | -          | - | - |



|  |            |   |   |              |          |          |             |           |            |            |   |   |
|--|------------|---|---|--------------|----------|----------|-------------|-----------|------------|------------|---|---|
|  | rs12449843 | A | G | -0.030459207 | 0.005151 | 4.45E-10 | -0.0304592  | 0.021678  | 0.16       | -          | - | - |
|  | rs1641511  | G | A | 0.029558802  | 0.005956 | 1.40E-08 | 0.0100503   | 0.0235841 | 0.67       | -          | - | - |
|  | rs17060460 | G | A | 0.029558802  | 0.005955 | 1.43E-08 | -0.0198026  | 0.0207539 | 0.34       | -          | - | - |
|  | rs2307111  | C | T | -0.030459207 | 0.005108 | 1.34E-11 | -0.00995033 | 0.0140879 | 0.48       | -          | - | - |
|  | rs2664299  | C | T | -0.030459207 | 0.005067 | 4.48E-11 | -0.00995033 | 0.0212751 | 0.64       | -          | - | - |
|  | rs2981329  | C | T | 0.029558802  | 0.00579  | 7.74E-09 | -0.0295588  | 0.0230649 | 0.2        | -          | - | - |
|  | rs34107769 | C | T | -0.030459207 | 0.005485 | 9.93E-09 | -0.0198026  | 0.028037  | 0.48       | -          | - | - |
|  | rs35562935 | A | G | 0.058268908  | 0.009454 | 1.69E-08 | 0.0392207   | 0.037842  | 0.3        | -          | - | - |
|  | rs4987719  | T | C | 0.076961041  | 0.01368  | 3.59E-08 | 0.207014    | 0.120575  | 0.0860003  | -          | - | - |
|  | rs57222984 | G | A | 0.039220713  | 0.005824 | 3.03E-11 | -0.0100503  | 0.0228462 | 0.66       | rs62055714 | G | A |
|  | rs592333   | G | A | 0.039220713  | 0.005012 | 1.08E-16 | -0.00995033 | 0.0219285 | 0.649999   | -          | - | - |
|  | rs6855873  | T | C | 0.029558802  | 0.005822 | 2.08E-08 | -0.0304592  | 0.021678  | 0.16       | -          | - | - |
|  | rs7007887  | T | C | 0.039220713  | 0.005024 | 9.88E-14 | -0.0100503  | 0.0214889 | 0.64       | -          | - | - |
|  | rs732172   | T | C | 0.029558802  | 0.005154 | 1.35E-09 | 0.00995033  | 0.0184663 | 0.59       | -          | - | - |
|  | rs79275904 | T | C | -0.051293294 | 0.008855 | 5.64E-09 | 0.0295588   | 0.0374545 | 0.43       | rs7221192  | T | C |
|  | rs8047587  | T | G | 0.029558802  | 0.005036 | 2.13E-09 | -0.0100503  | 0.0243666 | 0.68       | rs11642015 | T | G |
|  | rs9309771  | A | G | 0.029558802  | 0.005018 | 5.65E-09 | -0.0512933  | 0.01787   | 0.00409996 | -          | - | - |
|  | rs947612   | G | A | 0.029558802  | 0.005761 | 9.92E-09 | 0.0100503   | 0.0168133 | 0.55       | -          | - | - |
|  | rs9933881  | C | T | 0.058268908  | 0.00948  | 8.94E-09 | 0.0512933   | 0.033877  | 0.13       | -          | - | - |

**FigureS1.** Sensitivity analysis (A), scatter plot (B), forest plot (C), and funnel plot (D) of the causal effect of frequent insomnia on RA risk.

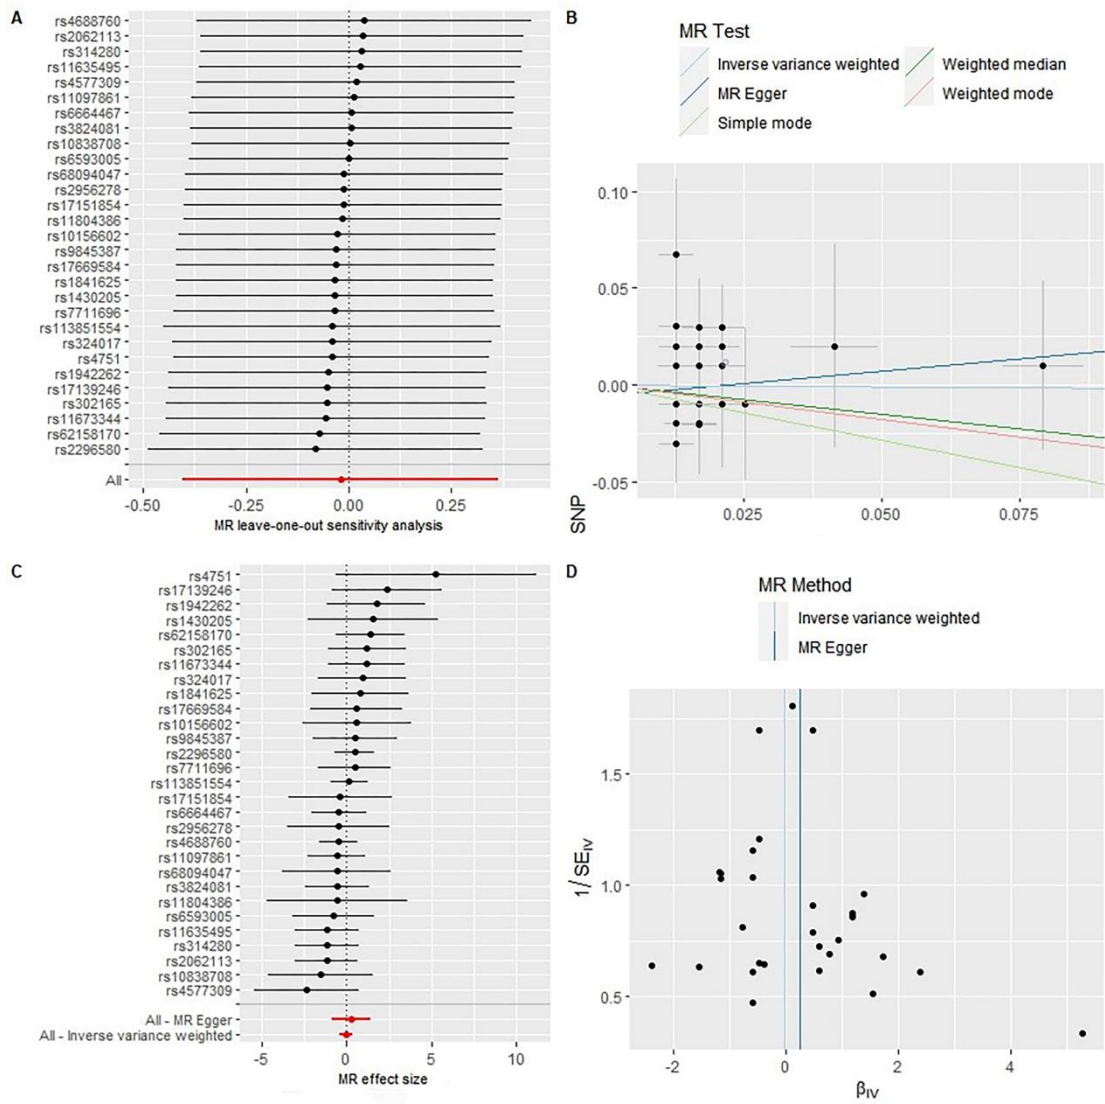

**FigureS2.** Sensitivity analysis (A), scatter plot (B), forest plot (C), and funnel plot (D) of the causal effect of any insomnia on RA risk.

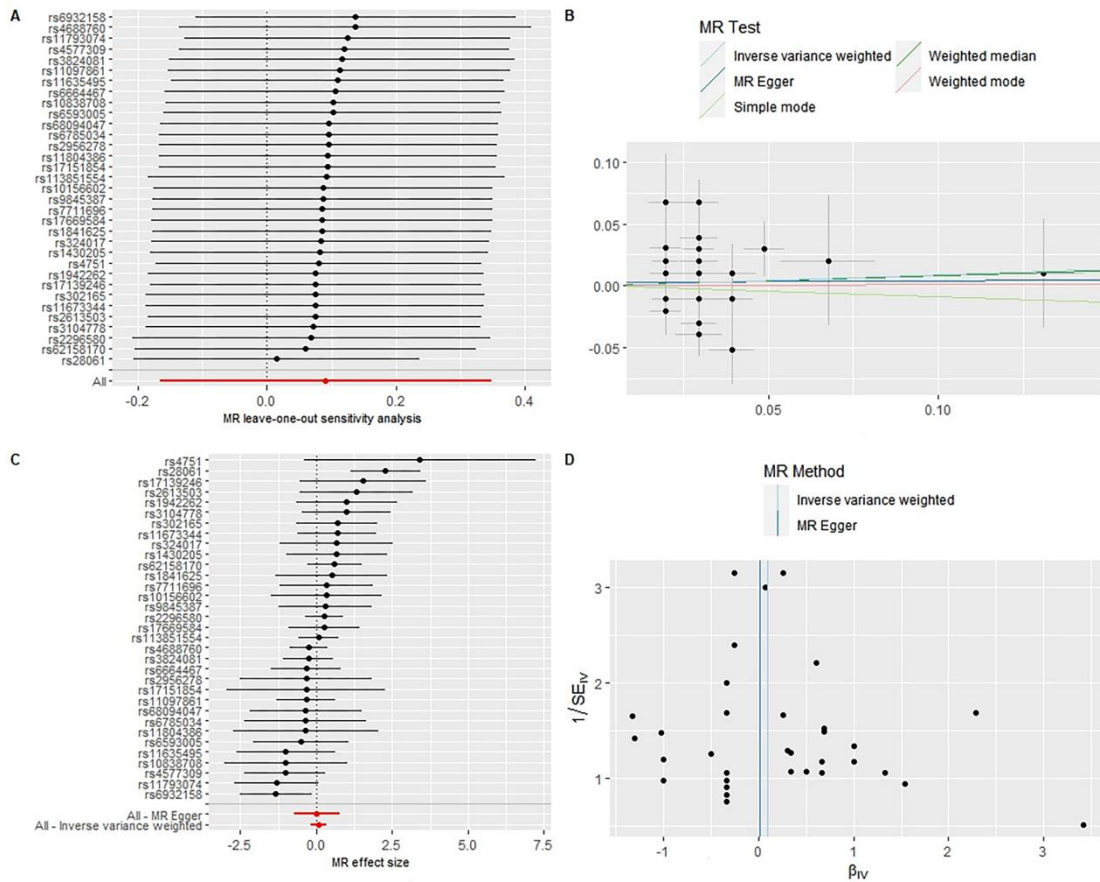

**FigureS3.** Sensitivity analysis (A), scatter plot (B), forest plot (C), and funnel plot (D) of the causal effect of sleep duration on RA risk.

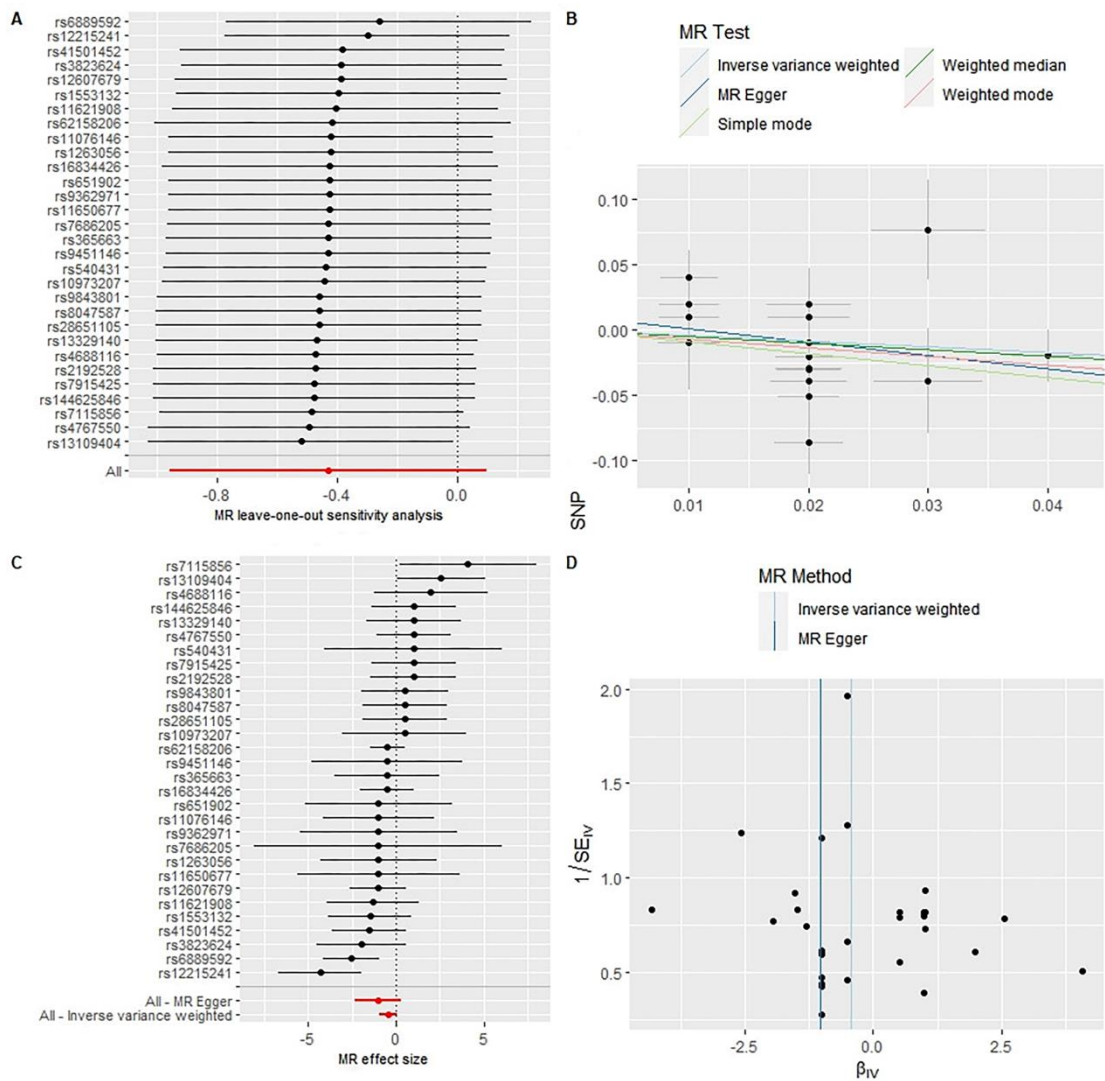

**FigureS4.** Sensitivity analysis (A), scatter plot (B), forest plot (C), and funnel plot (D) of the causal effect of getting up on RA risk.

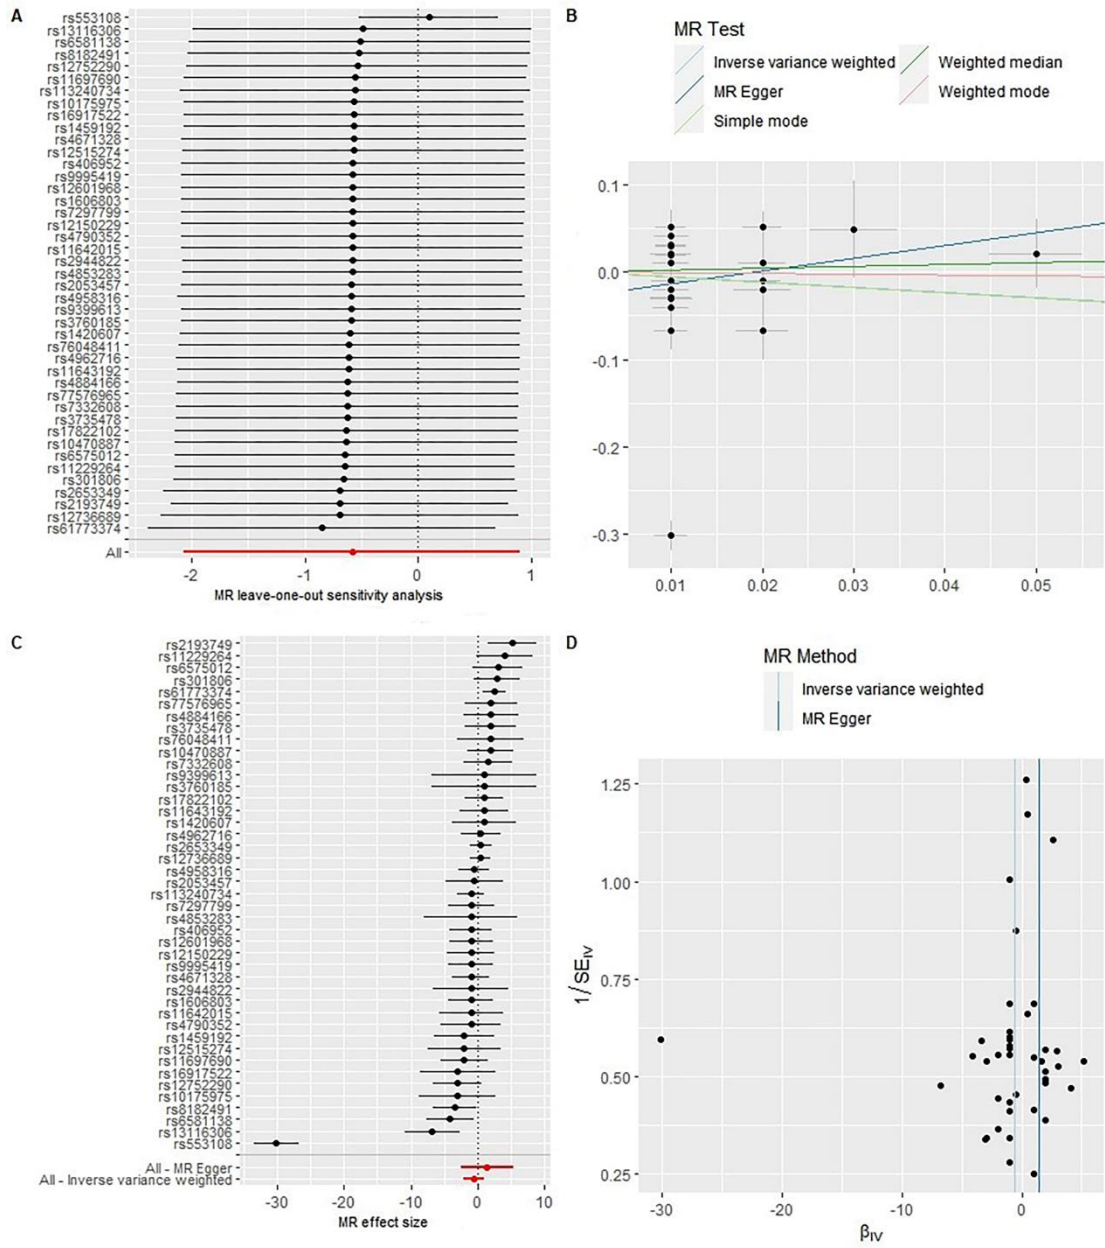

**FigureS5.** Sensitivity analysis (A), scatter plot (B), forest plot (C), and funnel plot (D) of the causal effect of morningness on RA risk.

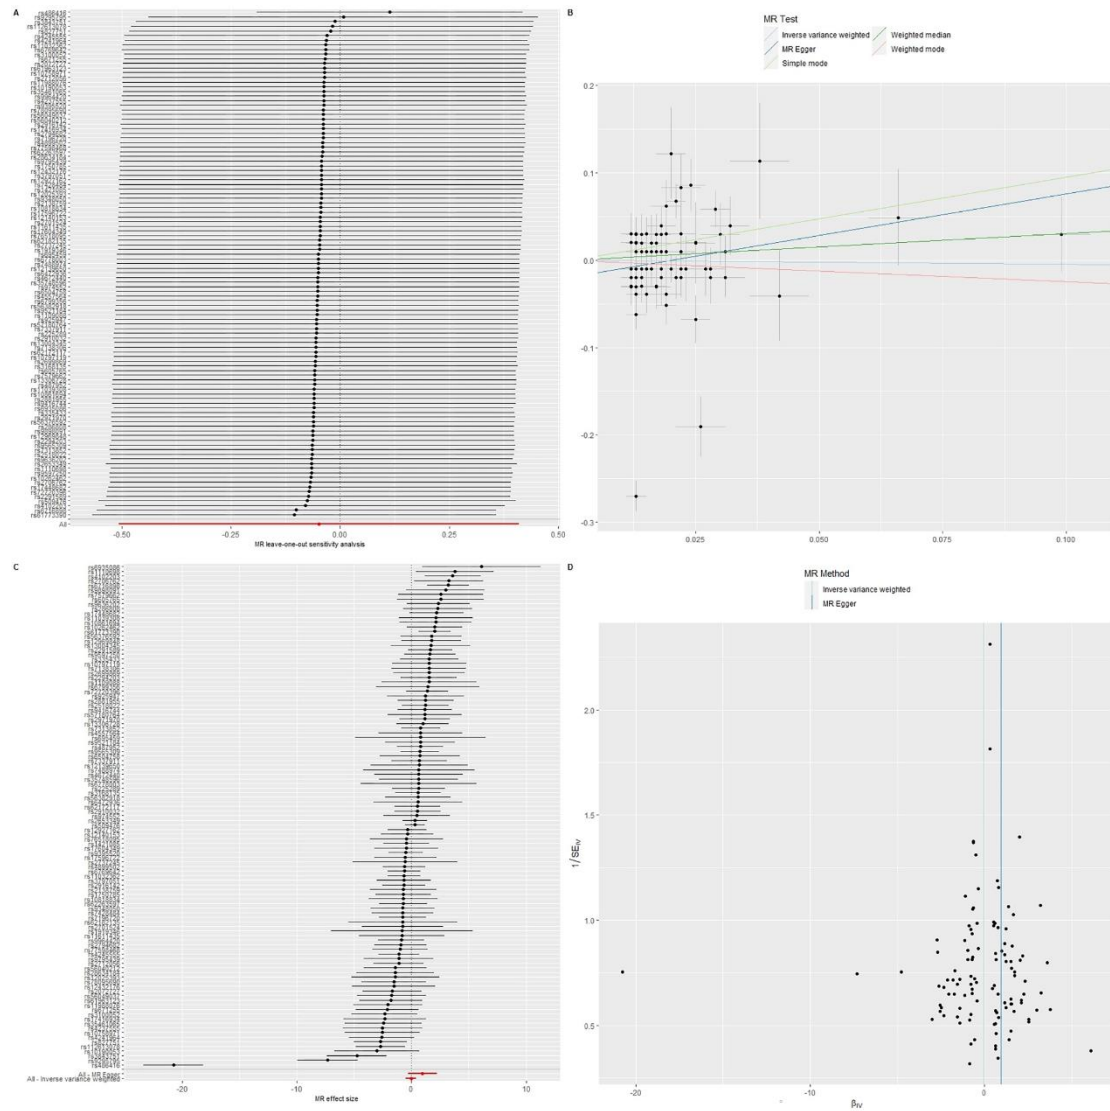

**FigureS6.** Sensitivity analysis (A), scatter plot (B), forest plot (C), and funnel plot (D) of the causal effect of snoring on RA risk.

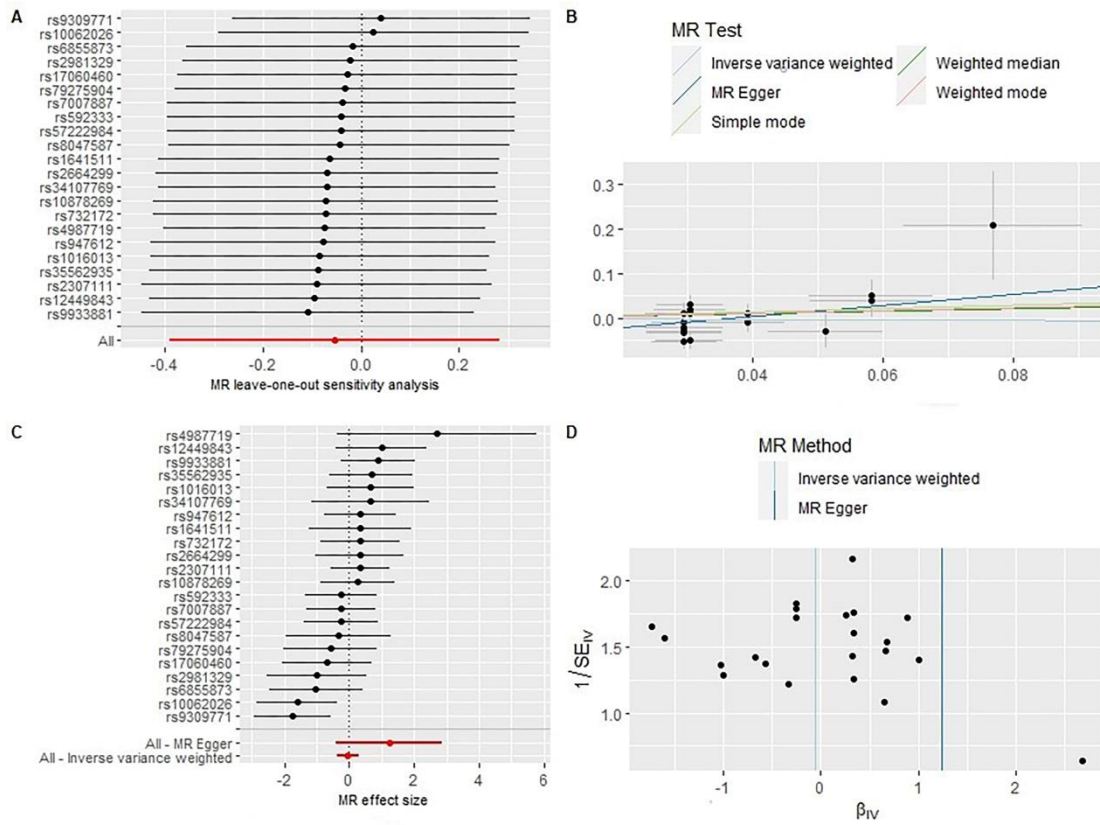

Supplement: Data_Sheet_1.pdf [file Data_Sheet_1.pdf]
